# Supplementary material for: Collision-induced dissociation of protonated uracil water clusters probed by molecular dynamics simulations
Source: Royal Society of Chemistry journal article supplement (doi:10.1039/d1cp03228c), 2021-01-01
Supplement: d1cp03228c1.pdf [file d1cp03228c1.pdf]

# Collision-induced dissociation of protonated uracil water clusters probed by molecular dynamics simulations

Electronic Supplementary Material

Linjie Zheng,<sup>†</sup> Mathias Rapacioli,<sup>\*,†</sup> Sébastien Zamith,<sup>‡</sup> Jean-Marc L'Hermite,<sup>‡</sup>  
and Jérôme Cuny<sup>\*,†</sup>

<sup>†</sup>*Laboratoire de Chimie et Physique Quantiques LCPQ/IRSAMC, Université de Toulouse (UPS) and CNRS, 118 Route de Narbonne, F-31062 Toulouse, France*

<sup>‡</sup>*Laboratoire Collisions Agrégats Réactivié LCAR/IRSAMC, Université de Toulouse (UPS) and CNRS, 118 Route de Narbonne, F-31062 Toulouse, France*

E-mail: mathias.rapacioli@irsamc.ups-tlse.fr; jerome.cuny@irsamc.ups-tlse.fr

## 1 Validation of $D_{NH}$ Parameter

To determine an appropriate  $D_{NH}$  parameter for the SCC-DFTB simulations of  $(\text{H}_2\text{O})_{1-7,11,12}\text{UH}^+$  clusters, three  $D_{NH}$  values were tested, 0.00, 0.12 and 0.14, by calculating the binding energy of two  $(\text{H}_2\text{O})\text{U}$  isomers, which structures are displayed in Figure S1, using MP2/Def2TZVP and SCC-DFTB methods. The results are shown in Table S1. The relative binding energy  $E_{Re}$  ( $E_{Re} = E_{bind_{DFTB}} - E_{bind_{MP2}}$ ) for isomer a is less than 2.0 kcal.mol<sup>-1</sup> when different  $D_{NH}$  parameters are used. For isomer b, the  $E_{Re}$  is 0.0 kcal.mol<sup>-1</sup> when  $D_{NH}$  is 0.12 and 0.14 and it is only 0.3 kcal.mol<sup>-1</sup> when  $D_{NH}$  is 0.0. This indicates that the value of  $D_{NH}$  has only a minor effect on the binding energy calculation of  $(\text{H}_2\text{O})\text{U}$ . We thus decided to use  $D_{NH}$  equal to 0.12 for all the simulations.

Table S1 Binding energy of two (H<sub>2</sub>O)U isomers using MP2/Def2TZVP and SCC-DFTB methods. All values are given in kcal.mol<sup>-1</sup>.

| <b>isomer</b> | $E_{bind_{MP2}}$ | $E_{bind_{DFTB}}$<br>$D_{NH_{0.0}}$ | $E_{Re}$ | $E_{bind_{DFTB}}$<br>$D_{NH_{0.12}}$ | $E_{Re}$ | $E_{bind_{DFTB}}$<br>$D_{NH_{0.14}}$ | $E_{Re}$ |
|---------------|------------------|-------------------------------------|----------|--------------------------------------|----------|--------------------------------------|----------|
| <b>a</b>      | -8.3             | -8.6                                | -0.3     | -9.8                                 | -1.5     | -10.0                                | -1.7     |
| <b>b</b>      | -6.9             | -6.6                                | 0.3      | -6.9                                 | 0.0      | -6.9                                 | 0.0      |

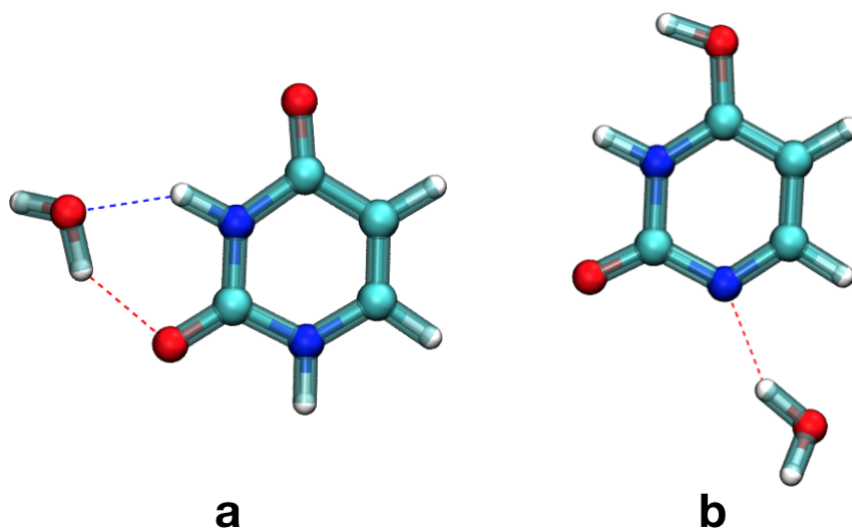

Figure S1 Structure of isomer a and b of (H<sub>2</sub>O)U.

## 2 Statistical Convergence

In order to ensure that statistical convergence is reached in the collision trajectories, initial conditions have to reproduce all possible collision orientation with good statistics. The procedure described in the main text to generate initial conditions fulfil this requirement. As a visual proof, Figure S2 a, b and c represents initial conditions generated for isomer 3b generated using 200, 400 and 600 random orientations and an impact parameter of 0.0. In these pictures,  $(\text{H}_2\text{O})_3\text{UH}^+$  is fixed and all initial positions for argon are superimposed. It worth pointing out that in practice, in the collision trajectories, argon is fixed and uracil is rotated. Figure S2 d presents the same data for 200 random orientations and for impact parameter 0.0 and 6.0. These Figures demonstrate that the more simulations are performed, the more colliding opportunities of Ar at all possible orientations are obtained. The same data for isomers 4b, 5d, 6f, 7a and 12f are provided in Figure S3 to S7, respectively. In addition, to confirm that statistical convergence is reached for the properties discussed in the main text, Table S2 and S3 present the  $P_{NUL}$  and  $\sigma_{frag}$  values for the lowest-energy isomer and the isomer which  $P_{NUL}$  fits best to the experiment (bold) obtained for 200, 400, and 600 initial random orientations per impact parameter value. Whatever the considered isomer, the three  $P_{NUL}$  and  $\sigma_{frag}$  values are very close. Indeed, the largest difference is observed for isomer 7a which has  $P_{NUL}$  values of 29.5 and 31.3 % for 200 and 600 random orientations, respectively. This demonstrates that even for 200 initial random orientations, simulation are close to statistical convergence. In the present study, all results discussed in the main text were obtained with 600 initial random orientations per  $b$  value which insures statistical convergence of the results independently of cluster size.

Table S2  $P_{NUL}$  and  $\sigma_{frag}$  values for the lowest-energy isomer (roman) and the isomer which  $P_{NUL}$  fits best to the experiment (bold) of  $(\text{H}_2\text{O})_{1-6}\text{UH}^+$  obtained from simulations consisting in 200, 400, and 600 initial random orientations per impact parameter.

| Cluster   | Random Orientations | $P_{NUL}$ (%) | $\sigma_{frag}$ ( $\text{\AA}^2$ ) |
|-----------|---------------------|---------------|------------------------------------|
| <b>1a</b> | 200                 | 0.1           | 28.4                               |
| <b>1a</b> | 400                 | 0.1           | 28.3                               |
| <b>1a</b> | 600                 | 0.2           | 28.9                               |
| 1b        | 200                 | 0.2           | 26.3                               |
| 1b        | 400                 | 0.1           | 25.7                               |
| 1b        | 600                 | 0.            | 25.9                               |
| 2a        | 200                 | 0.0           | 35.9                               |
| 2a        | 400                 | 0.0           | 36.5                               |
| 2a        | 600                 | 0.0           | 36.3                               |
| <b>2b</b> | 200                 | 0.0           | 34.7                               |
| <b>2b</b> | 400                 | 0.1           | 34.8                               |
| <b>2b</b> | 600                 | 0.1           | 34.9                               |
| 3a        | 200                 | 5.4           | 37.4                               |
| 3a        | 400                 | 5.2           | 36.2                               |
| 3a        | 600                 | 5.7           | 36.3                               |
| <b>3b</b> | 200                 | 0.0           | 41.2                               |
| <b>3b</b> | 400                 | 0.0           | 41.5                               |
| <b>3b</b> | 600                 | 0.0           | 41.9                               |
| 4a        | 200                 | 26.9          | 40.1                               |
| 4a        | 400                 | 28.2          | 40.3                               |
| 4a        | 600                 | 29.4          | 40.1                               |
| <b>4b</b> | 200                 | 2.7           | 45.3                               |
| <b>4b</b> | 400                 | 2.6           | 45.6                               |
| <b>4b</b> | 600                 | 2.6           | 45.2                               |
| 5a        | 200                 | 45.7          | 37.2                               |
| 5a        | 400                 | 46.1          | 37.8                               |
| 5a        | 600                 | 46.6          | 38.2                               |
| <b>5d</b> | 200                 | 0.1           | 47.3                               |
| <b>5d</b> | 400                 | 0.1           | 47.3                               |
| <b>5d</b> | 600                 | 0.1           | 47.5                               |
| 6a        | 200                 | 38.0          | 46.6                               |
| 6a        | 400                 | 38.0          | 45.6                               |
| 6a        | 600                 | 39.3          | 45.8                               |
| <b>6f</b> | 200                 | 18.9          | 54.2                               |
| <b>6f</b> | 400                 | 19.0          | 55.2                               |
| <b>6f</b> | 600                 | 18.5          | 55.0                               |

Table S3  $P_{NUL}$  and  $\sigma_{frag}$  values for the lowest-energy isomer (roman) and the isomer which  $P_{NUL}$  fits best to the experiment (bold) of  $(\text{H}_2\text{O})_{7,11,12}\text{UH}^+$  obtained from simulations consisting in 200, 400, and 600 initial random orientations per impact parameter.

| Cluster    | Random Orientations | $P_{NUL}$ (%) | $\sigma_{frag}$ ( $\text{\AA}^2$ ) |
|------------|---------------------|---------------|------------------------------------|
| 7a         | 200                 | 29.5          | 54.8                               |
| 7a         | 400                 | 31.3          | 53.4                               |
| 7a         | 600                 | 31.3          | 53.4                               |
| <b>7d</b>  | 200                 | 22.6          | 55.3                               |
| <b>7d</b>  | 400                 | 22.9          | 54.3                               |
| <b>7d</b>  | 600                 | 23.0          | 54.0                               |
| 11a        | 200                 | 26.7          | 53.8                               |
| 11a        | 400                 | 28.2          | 53.5                               |
| 11a        | 600                 | 28.3          | 52.9                               |
| <b>11d</b> | 200                 | 14.5          | 55.2                               |
| <b>11d</b> | 400                 | 15.4          | 56.1                               |
| <b>11d</b> | 600                 | 15.6          | 56.5                               |
| 12a        | 200                 | 8.0           | 59.2                               |
| 12a        | 400                 | 7.5           | 60.5                               |
| 12a        | 600                 | 7.6           | 60.2                               |
| <b>12c</b> | 200                 | 10.4          | 55.3                               |
| <b>12c</b> | 400                 | 10.8          | 55.8                               |
| <b>12c</b> | 600                 | 10.8          | 55.4                               |

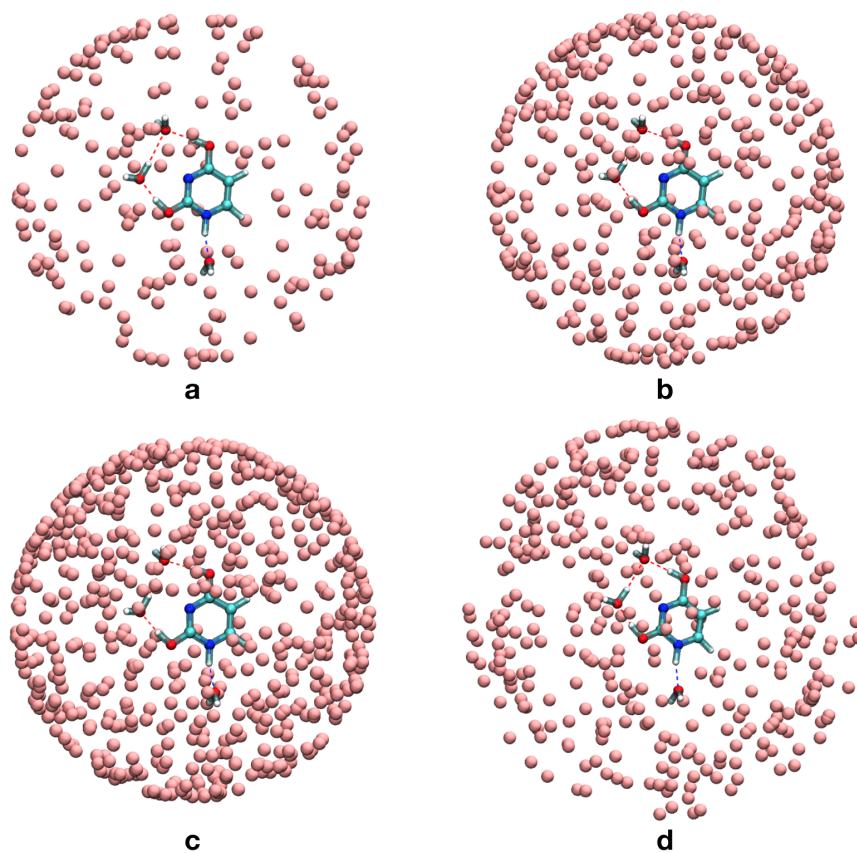

Figure S2 Schematic representation of the initial conditions for the collision simulations of isomer 3b. 200 (a), 400 (b) and 600 (c) random orientations are generated with a unique impact parameter equal to 0.0. (d) 200 orientations are generated with impact parameters 0.0 and 6.0.

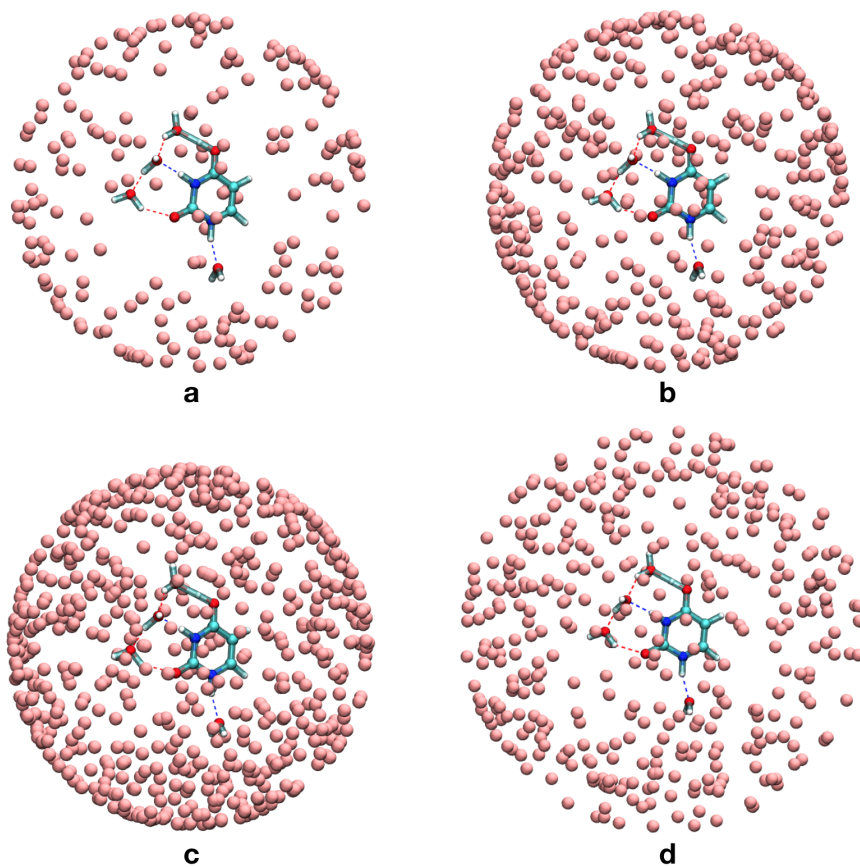

Figure S3 Schematic representation of the initial conditions for the collision simulations of isomer 4b. 200 (a), 400 (b) and 600 (c) random orientations are generated with a unique impact parameter equal to 0.0. (d) 200 orientations are generated with impact parameters 0.0 and 6.5.

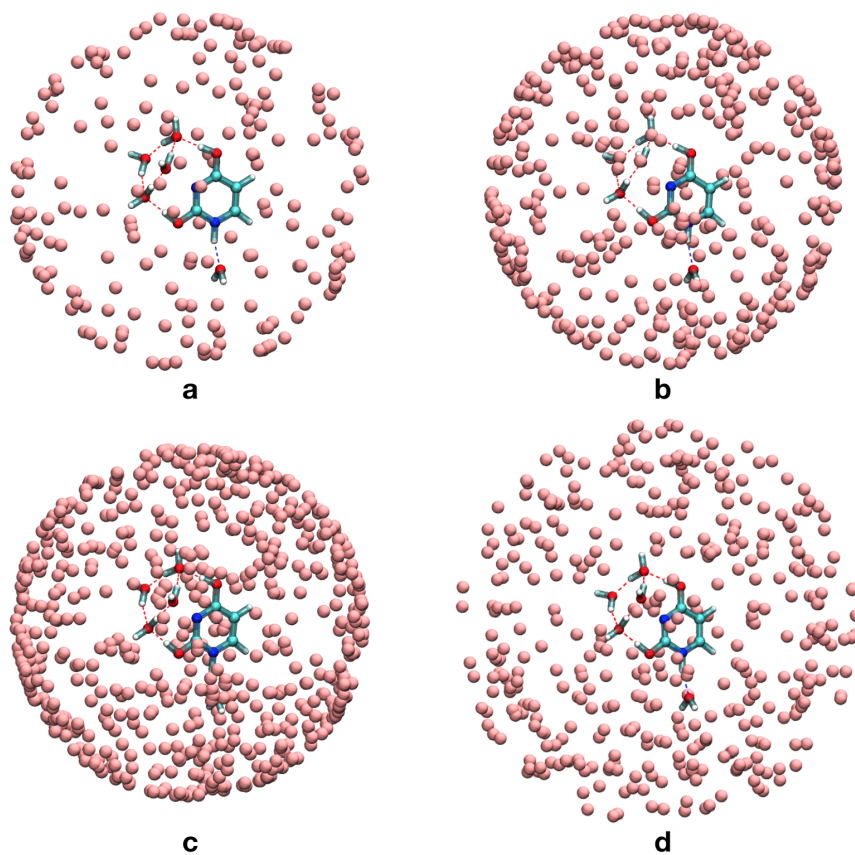

Figure S4 Schematic representation of the initial conditions for the collision simulations of isomer 5d. 200 (a), 400 (b) and 600 (c) random orientations are generated with a unique impact parameter equal to 0.0. (d) 200 orientations are generated with impact parameters 0.0 and 6.5.



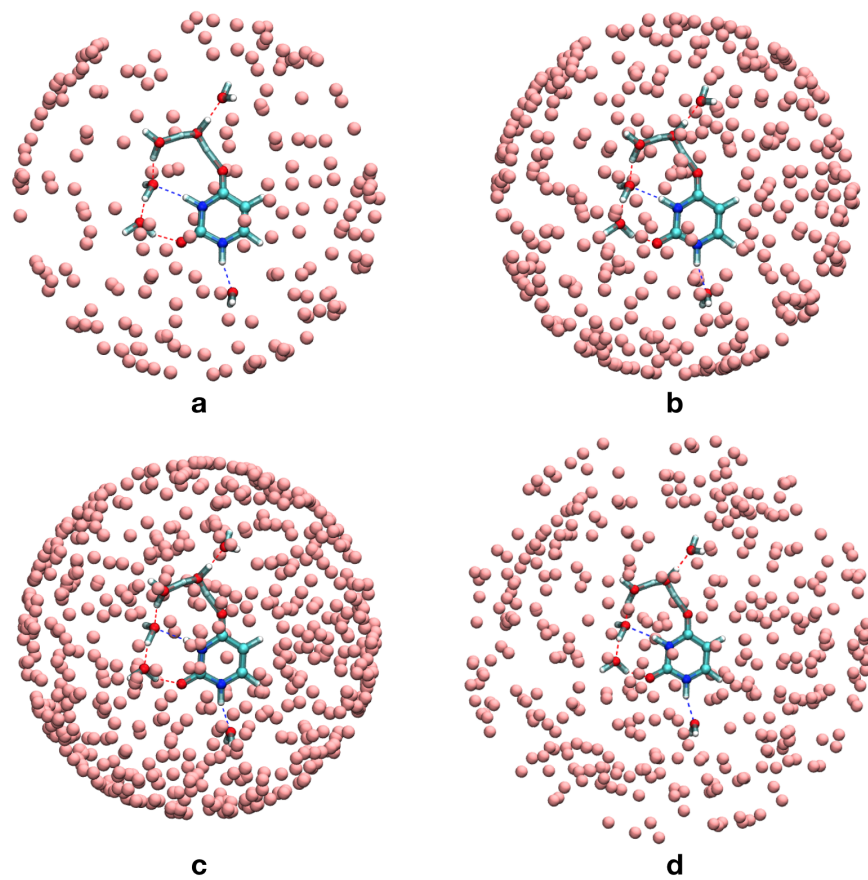

Figure S5 Schematic representation of the initial conditions for the collision simulations of isomer 6f. 200 (a), 400 (b) and 600 (c) random orientations are generated with a unique impact parameter equal to 0.0. (d) 200 orientations are generated with impact parameters 0.0 and 7.5.

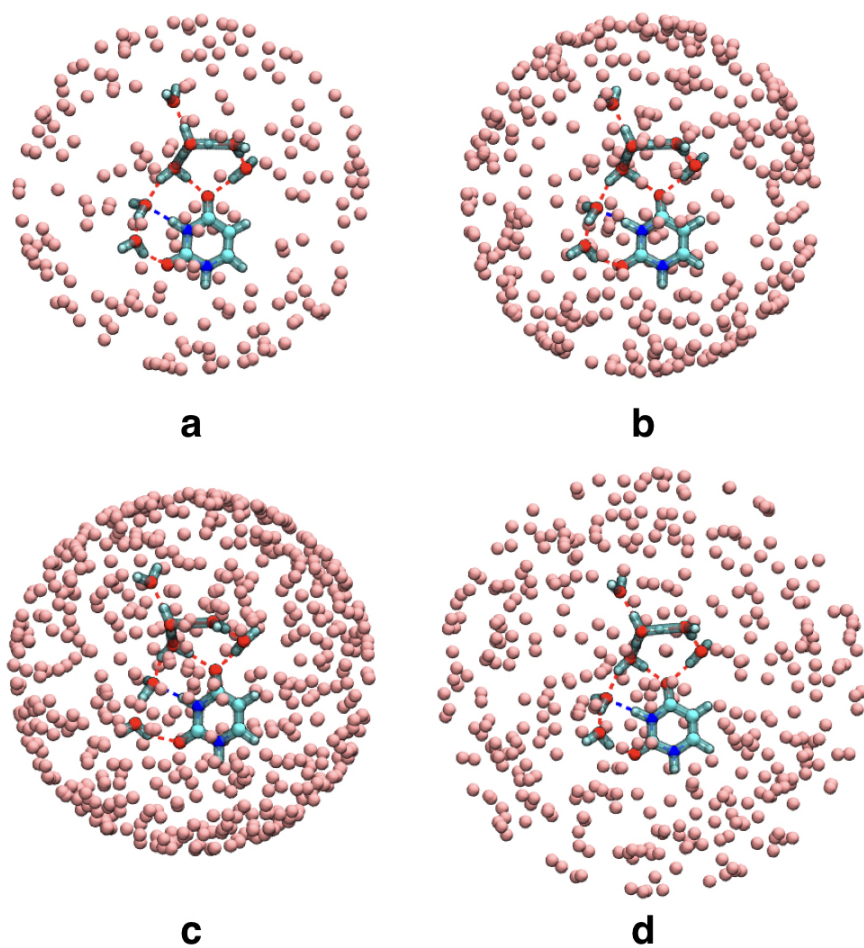

Figure S6 Schematic representation of the initial conditions for the collision simulations of isomer 7a. 200 (a), 400 (b) and 600 (c) random orientations are generated with a unique impact parameter equal to 0.0. (d) 200 orientations are generated with impact parameters 0.0 and 7.5.

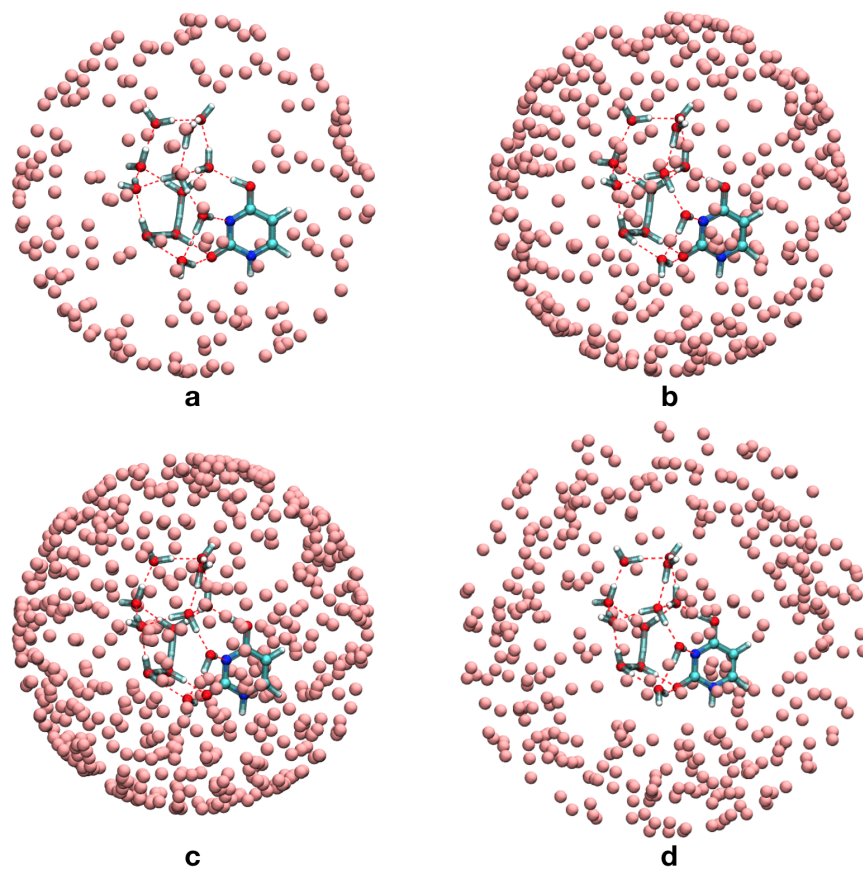

Figure S7 Schematic representation of the initial conditions for the collision simulations of isomer 12f. 200 (a), 400 (b) and 600 (c) random orientations are generated with a unique impact parameter equal to 0.0. (d) 200 orientations are generated with impact parameters 0.0 and 7.5.

Table S4  $R_{max}$  value (Å), number of  $b$  values and dissociation probability at  $R_{max}$  for all considered isomers.  $R_{max}$  is calculated as  $\lfloor 2R \rfloor / 2 + 1.5$  Å, where  $R$  is the radius of the considered isomer. Dissociation probability at  $R_{max}$ , evaluated over 600 collision trajectories, indicates how converged are the results with respect to the number of  $b$  values. The lower the dissociation probability at  $R_{max}$ , the better is the convergence. The maximum dissociation probability at  $R_{max}$  is 2.7%, which indicates that the present definition of  $R_{max}$  is good enough to insure convergency.

| Isomers    | $R_{max}$ (Å) | Number of $b$ Values | Dissociation Probability at $R_{max}$ (%) |
|------------|---------------|----------------------|-------------------------------------------|
| <b>1a</b>  | 5.5           | 12                   | 0.0                                       |
| 1b         | 5.5           | 12                   | 0.0                                       |
| 2a         | 5.5           | 12                   | 0.2                                       |
| <b>2b</b>  | 5.5           | 12                   | 0.0                                       |
| 3a         | 5.5           | 12                   | 0.0                                       |
| <b>3b</b>  | 6.5           | 14                   | 0.0                                       |
| 4a         | 6.5           | 14                   | 1.0                                       |
| <b>4b</b>  | 6.5           | 14                   | 0.0                                       |
| 5a         | 5.5           | 12                   | 0.0                                       |
| 5b         | 6.5           | 14                   | 0.0                                       |
| 5c         | 7.0           | 15                   | 0.3                                       |
| <b>5d</b>  | 6.5           | 14                   | 1.5                                       |
| 6a         | 7.0           | 15                   | 0.7                                       |
| 6b         | 6.5           | 14                   | 2.7                                       |
| 6c         | 7.0           | 15                   | 0.8                                       |
| 6d         | 6.0           | 13                   | 0.0                                       |
| 6e         | 7.0           | 15                   | 0.2                                       |
| <b>6f</b>  | 8.0           | 17                   | 0.0                                       |
| 7a         | 7.5           | 16                   | 0.7                                       |
| 7b         | 7.0           | 15                   | 1.5                                       |
| 7c         | 7.0           | 15                   | 2.3                                       |
| <b>7d</b>  | 7.5           | 16                   | 0.2                                       |
| 11a        | 7.5           | 16                   | 0.0                                       |
| 11b        | 7.5           | 16                   | 0.0                                       |
| 11c        | 7.5           | 16                   | 0.0                                       |
| <b>11d</b> | 7.5           | 16                   | 0.3                                       |
| 11e        | 7.5           | 16                   | 0.0                                       |
| 11f        | 7.0           | 15                   | 0.0                                       |
| 12a        | 8.0           | 17                   | 0.8                                       |
| 12b        | 7.0           | 15                   | 0.0                                       |
| <b>12c</b> | 7.0           | 15                   | 0.0                                       |
| 12d        | 7.0           | 15                   | 0.0                                       |
| 12e        | 7.0           | 15                   | 0.0                                       |
| 12f        | 7.5           | 16                   | 0.0                                       |

### 3 Time-dependent proportion of fragments

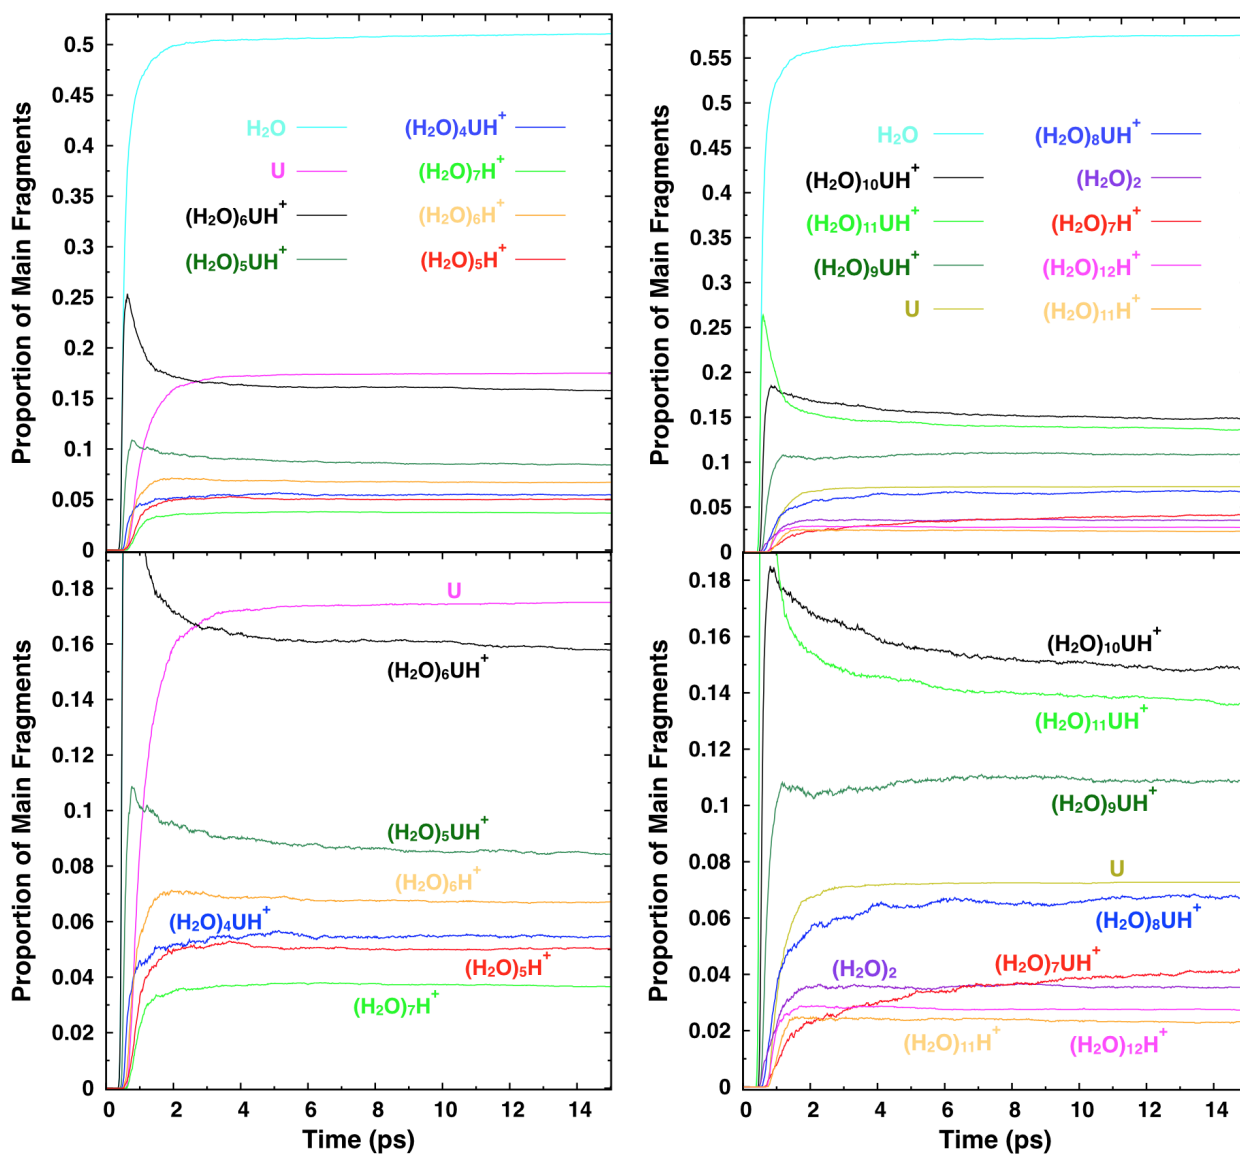

Figure S8 Time-dependent proportions of the main fragments obtained from the dissociation of isomers 7d (left) and 12c (right). Bottom panels correspond to a zoom over the lower proportions.

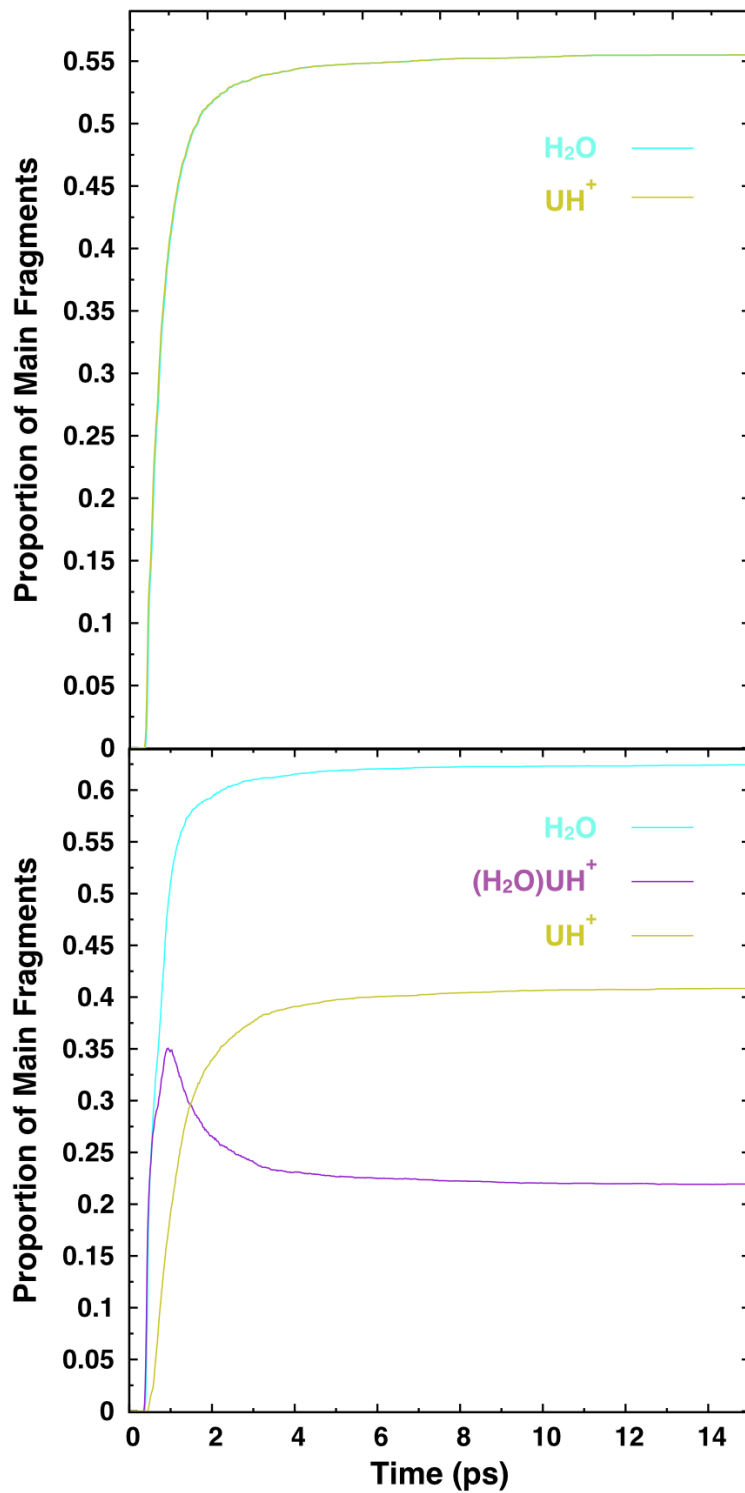

Figure S9 Time-dependent proportions of the main fragments obtained from the dissociation of isomers 1a (top) and 2a (bottom).

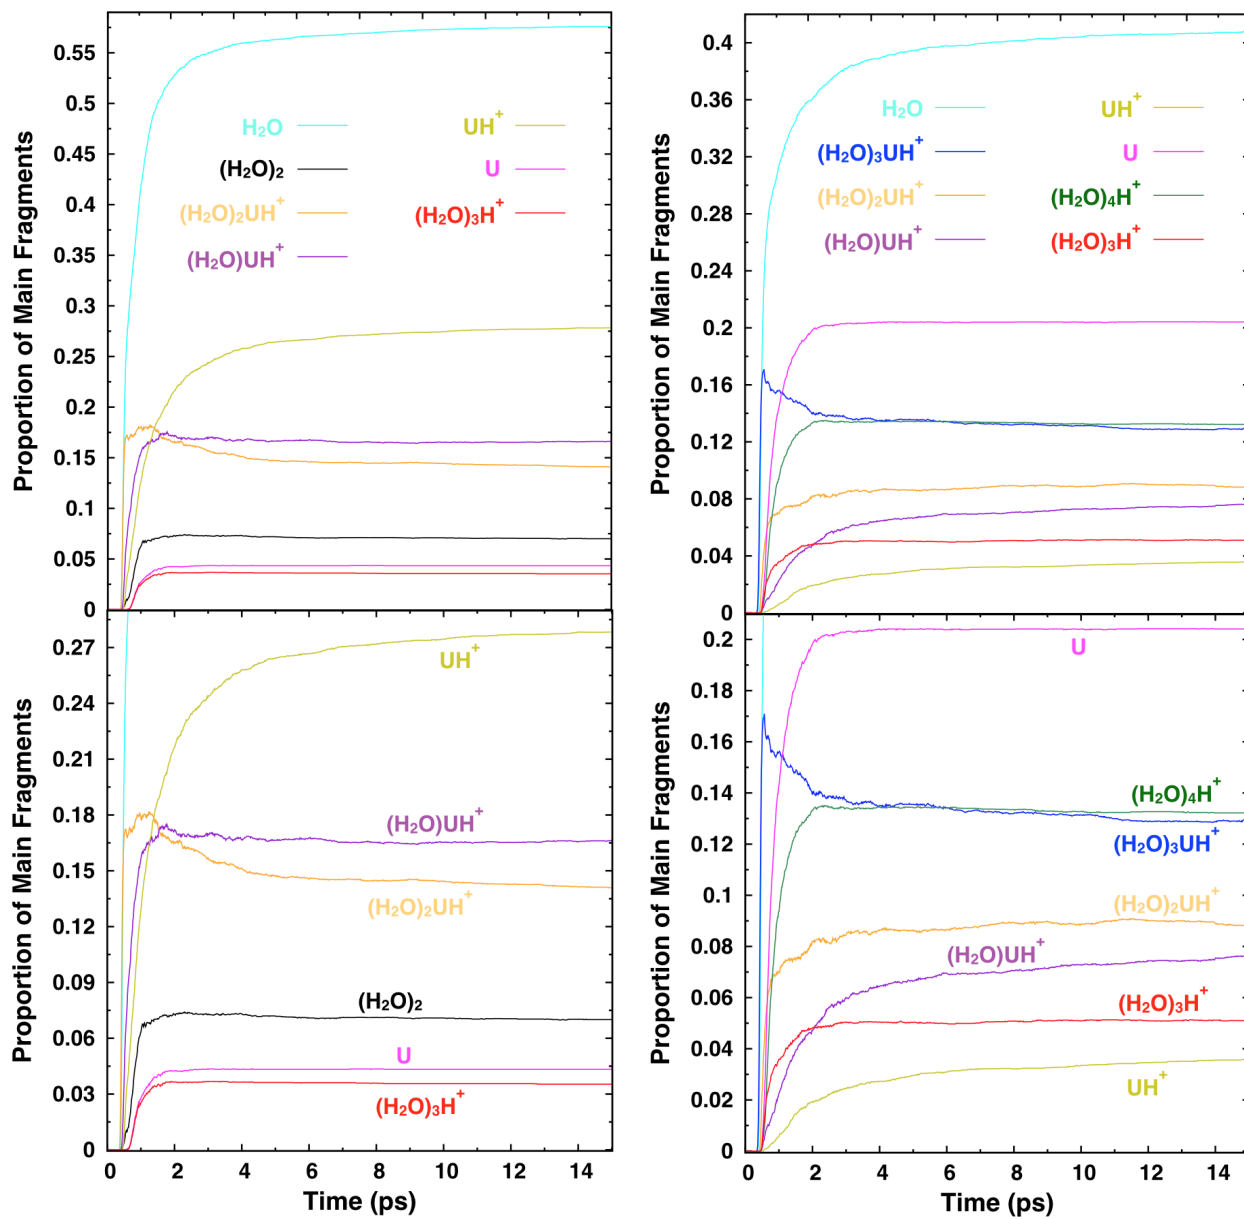

Figure S10 Time-dependent proportions of the main fragments obtained from the dissociation of isomers 3a (left) and 4a (right). Bottom panels correspond to a zoom over the lower proportions.

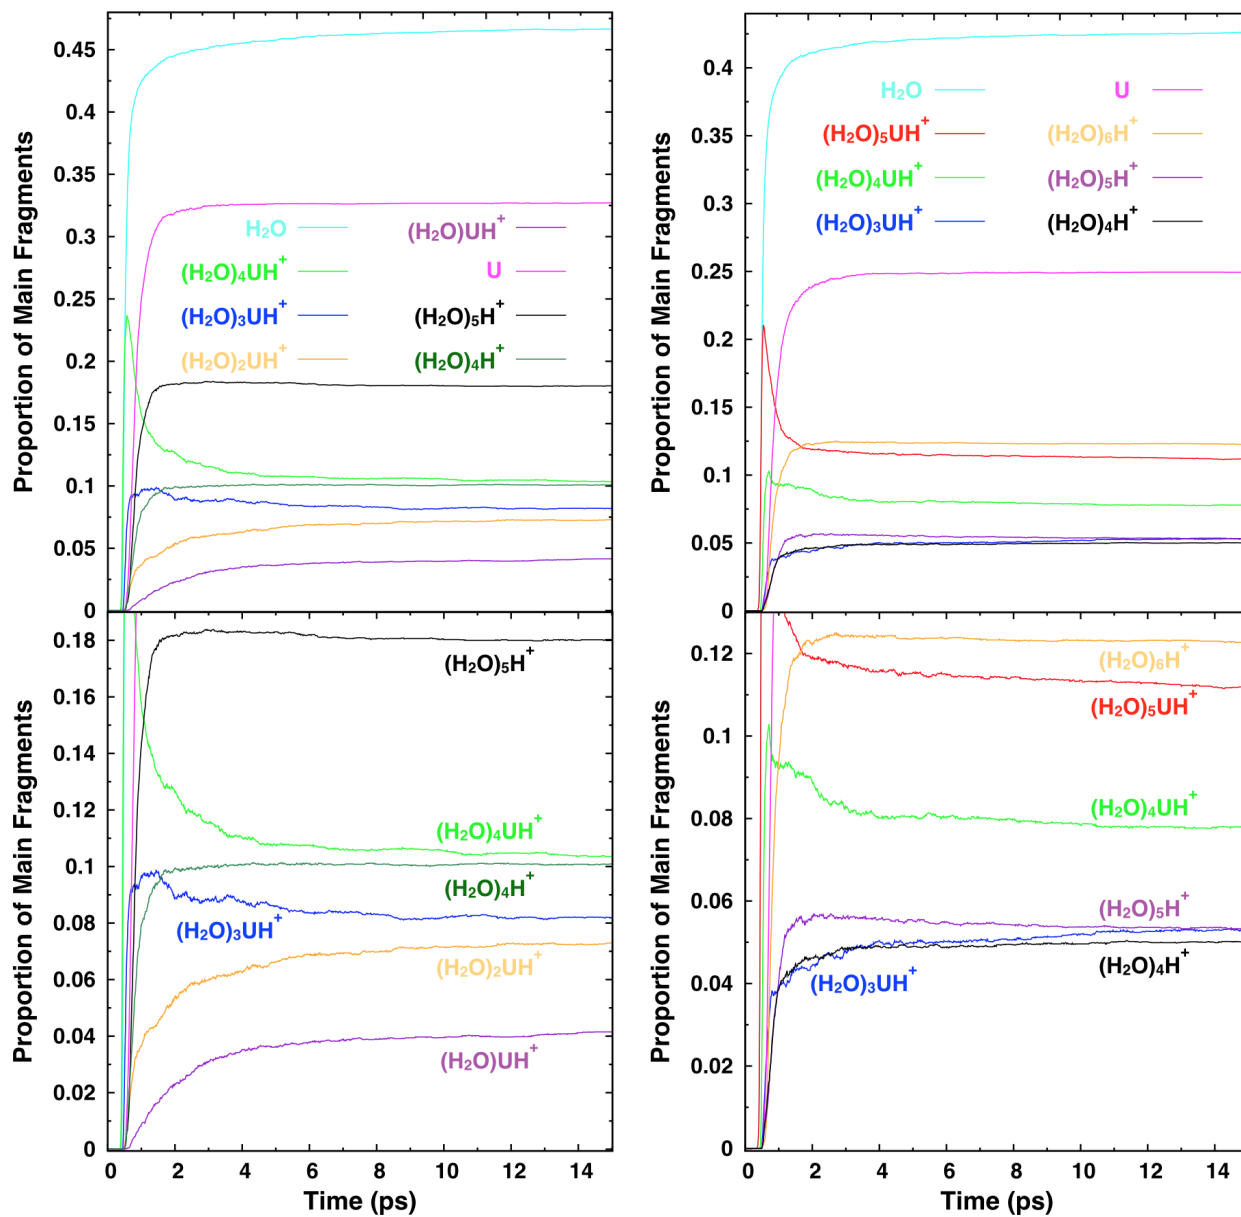

Figure S11 Time-dependent proportions of the main fragments obtained from the dissociation of isomers 5a (left) and 6a (right). Bottom panels correspond to a zoom over the lower proportions.



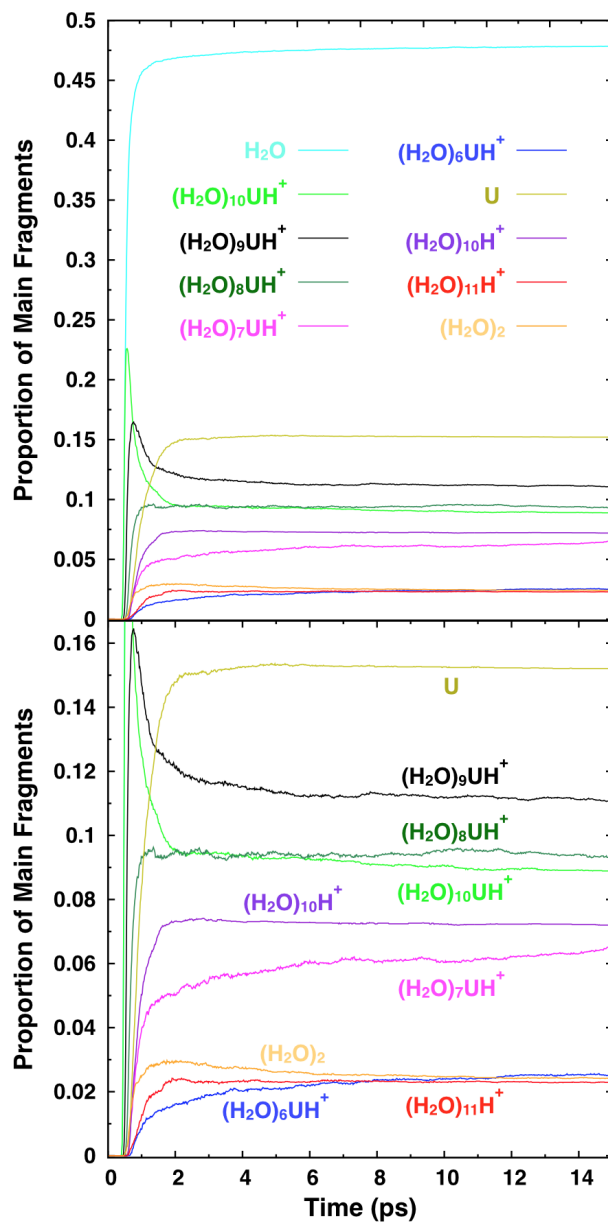

Figure S12 Time-dependent proportions of the main fragments obtained from the dissociation of isomer 11a. Bottom panels correspond to a zoom over the lower proportions.

## 4 Comparison of $P_{NUL}$ and $\sigma_{frag}$ including Experimental Data with Ne

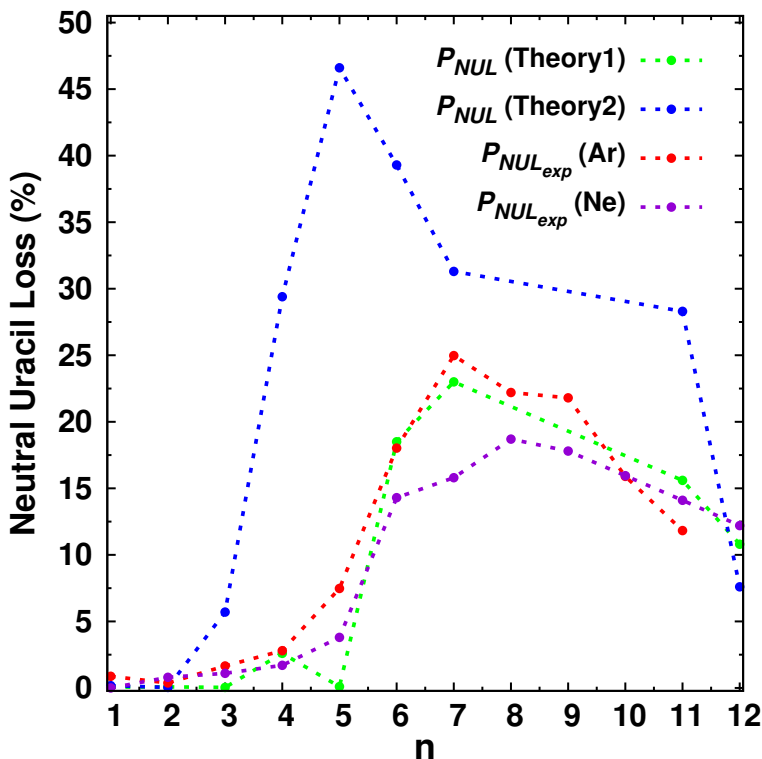

Figure S13 Theoretical (green and blue lines) and experimental (red line for Ar and purple for Ne)  $P_{NUL}$  values for the  $(\text{H}_2\text{O})_n\text{UH}^+$  clusters ( $n=1-7,11,12$  for theory,  $n=1-11$  for experiments with Ar and  $n=1-12$  for experiments with Ne). Theory 1 (green line) is obtained from the isomers which  $P_{NUL}$  matches best to the experimental data while Theory 2 (blue line) is obtained from lowest-energy isomers.

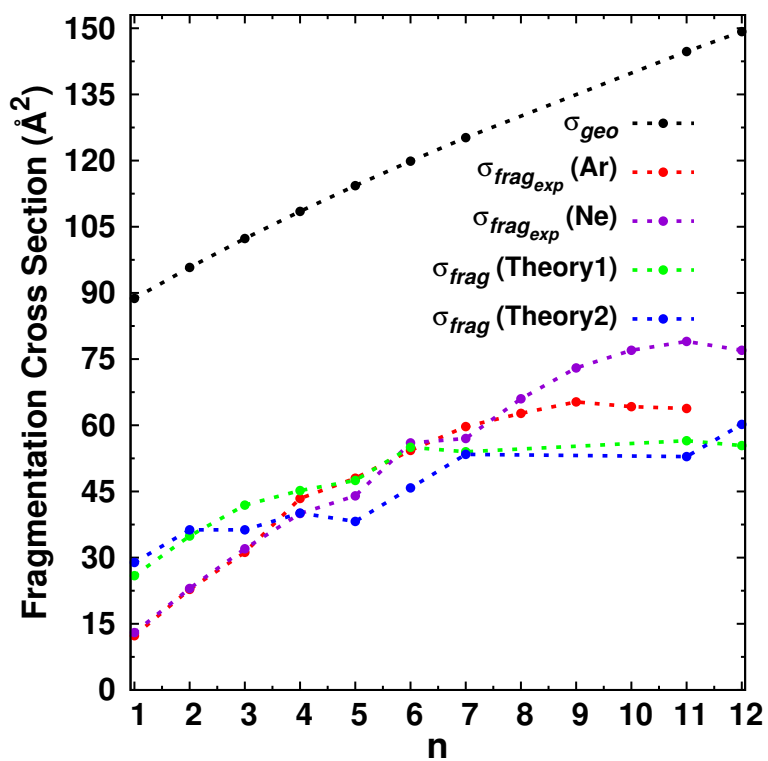

Figure S14 Theoretical (green and blue lines) and experimental (red line for Ar and purple for Ne)  $\sigma_{frag}$  values for the  $(H_2O)_nUH^+$  clusters ( $n=1-7,11,12$  for theory,  $n=1-11$  for experiments with Ar and  $n=1-12$  for experiments with Ne). Theory 1 (green line) is obtained from the isomers which  $P_{NUL}$  matches best to the experimental data while Theory 2 (blue line) is obtained from lowest-energy isomers.

## 5 Mass Spectrum of Fragments with Excess Proton

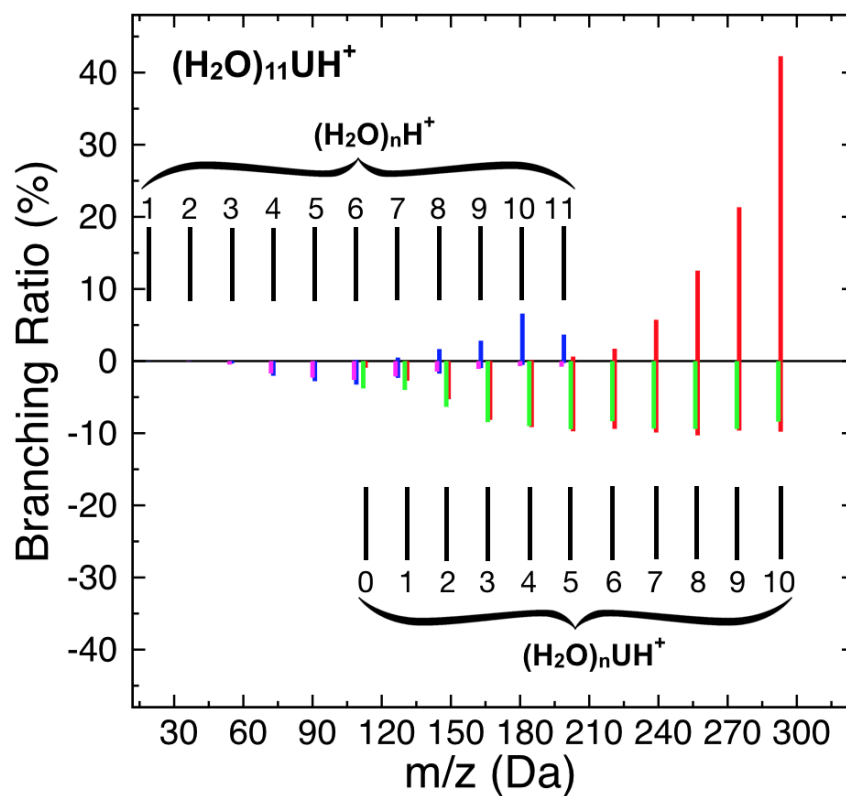

Figure S15 Simulated mass spectra of the charged fragments after 15 ps simulation time for isomer 11d (positive area) together with the experimental ones (negative area). For collisions with Argon, fragments  $(\text{H}_2\text{O})_n\text{H}^+$  are plotted in blue whereas  $(\text{H}_2\text{O})_n\text{UH}^+$  fragments are plotted in red. For collisions with Neon Fragments  $(\text{H}_2\text{O})_n\text{H}^+$  are plotted in pink whereas fragments  $(\text{H}_2\text{O})_n\text{UH}^+$  are plotted in green.

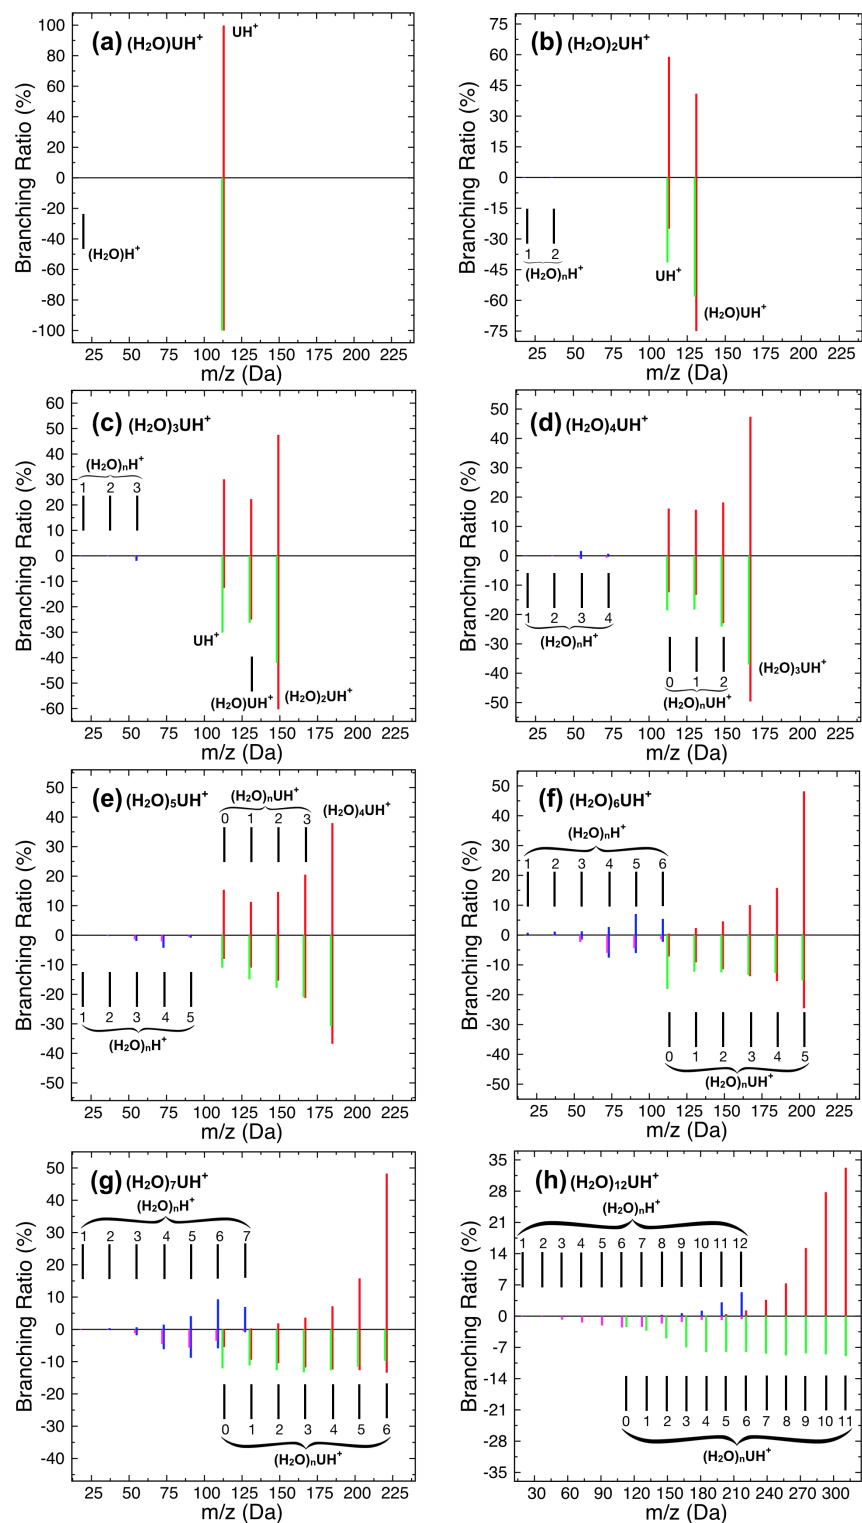

Figure S16 Simulated mass spectra of the charged fragments after 15 ps simulation time for isomers (a) 1a, (b) 2b, (c) 3b, (d) 4b, (e) 5d, (f) 6f, (g) 7d, (h) 12c (positive area) together with the experimental ones (negative area). For collisions with Argon, fragments  $(\text{H}_2\text{O})_n\text{H}^+$  are plotted in blue whereas  $(\text{H}_2\text{O})_n\text{UH}^+$  fragments are plotted in red. For collisions with Neon Fragments  $(\text{H}_2\text{O})_n\text{H}^+$  are plotted in pink whereas fragments  $(\text{H}_2\text{O})_n\text{UH}^+$  are plotted in green.

## 6 Energy Conservation

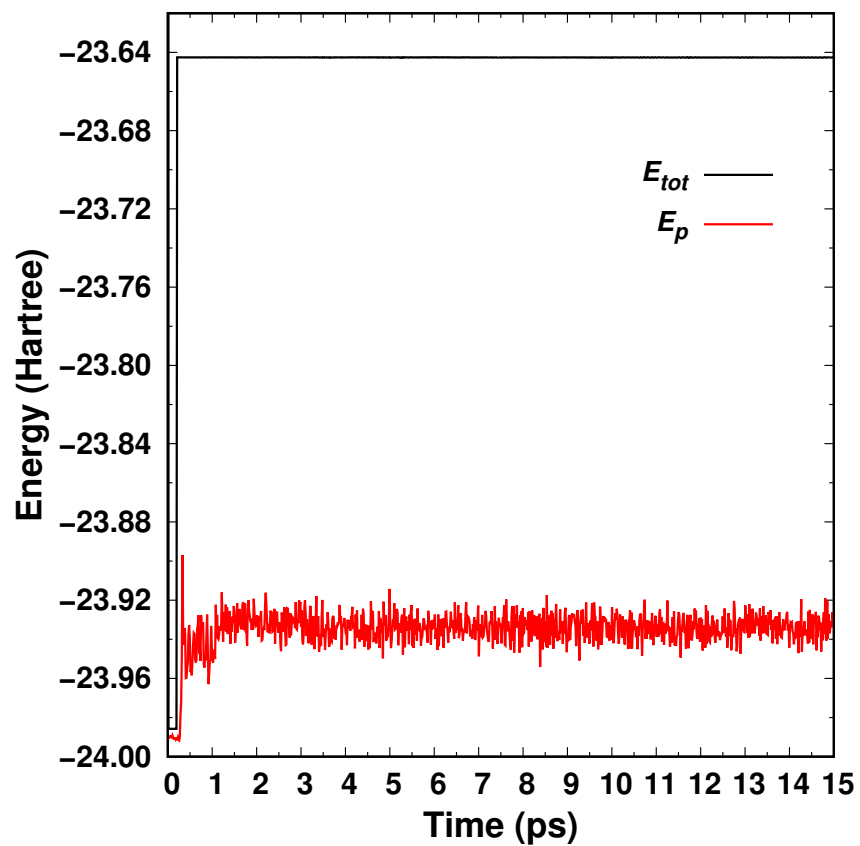

Figure S17 Total energy  $E_{tot}$  (black line) and potential energy  $E_p$  (red line) of a randomly selected trajectory of isomer 1a.

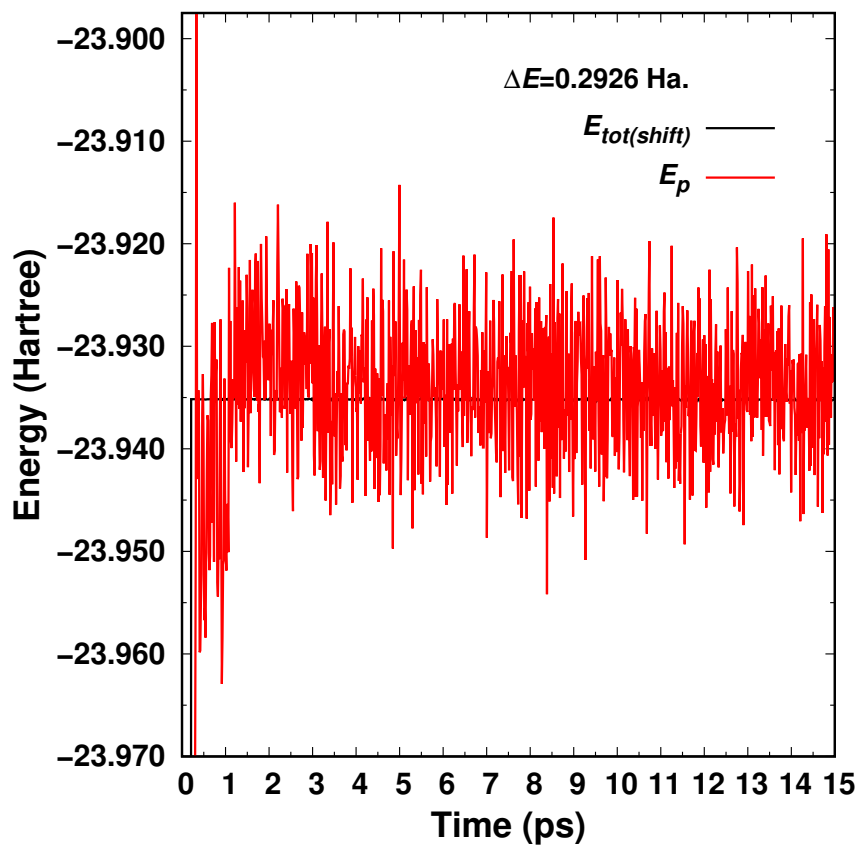

Figure S18 Shifted total energy  $E_{tot(shift)}$  (black line), pan down 0.2926 Hartree of the total energy, and potential energy  $E_p$  (red line) of a the same randomly selected trajectory of isomer 1a than presented in Figure S17.

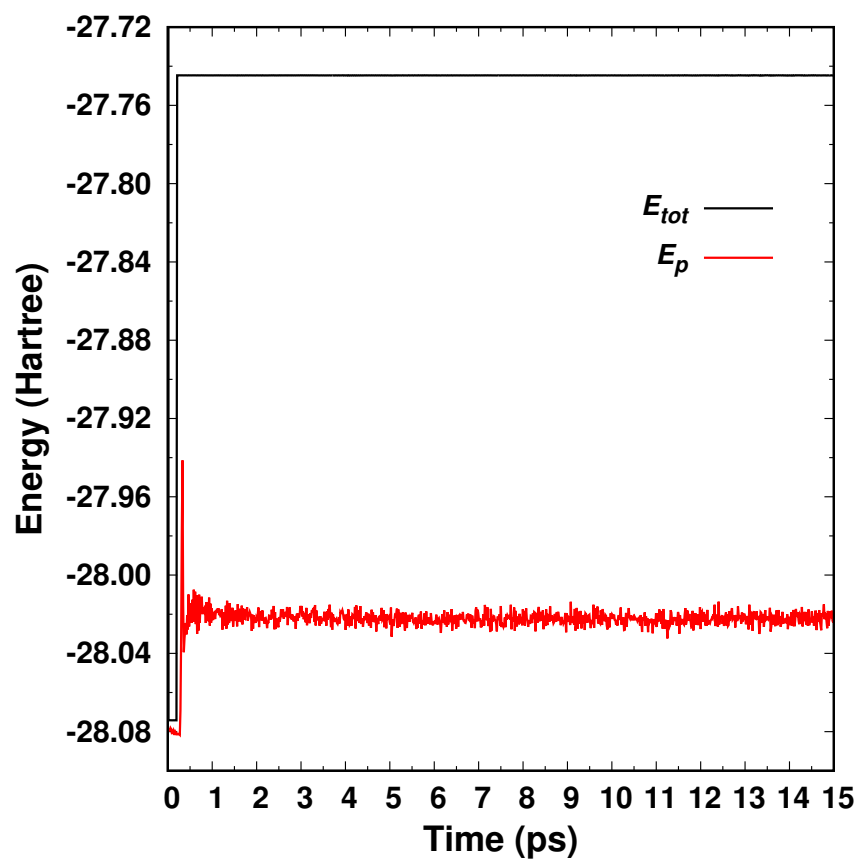

Figure S19 Total energy  $E_{tot}$  (black line) and potential energy  $E_p$  (red line) of a randomly selected trajectory of isomer 2b.



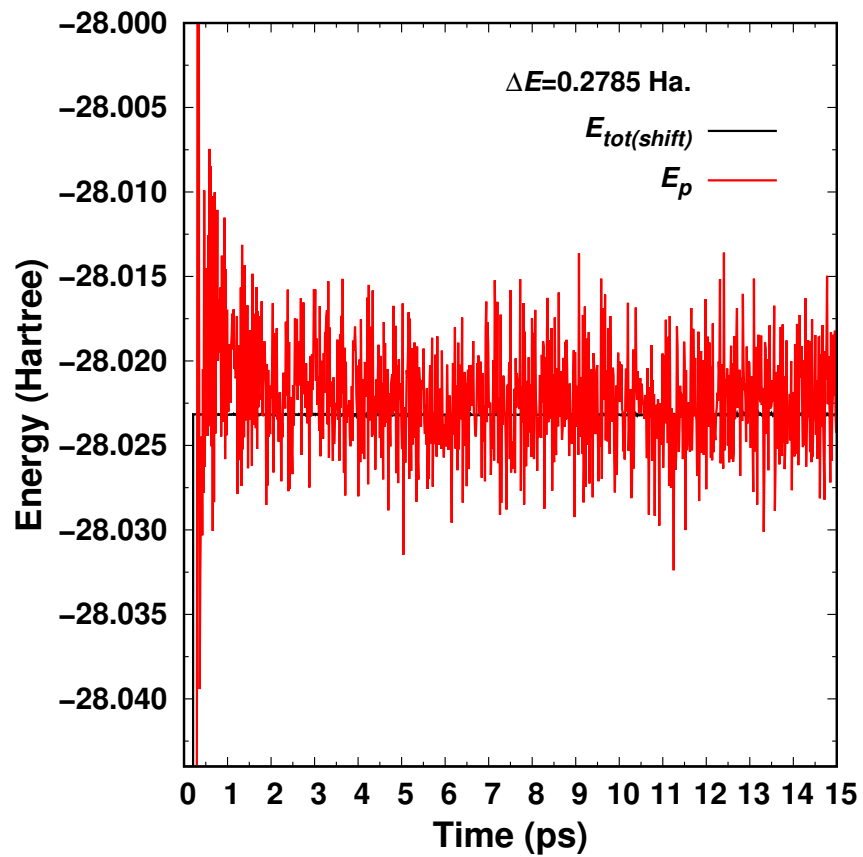

Figure S20 Shifted total energy  $E_{tot(shift)}$  (black line), pan down 0.2785 Hartree of the total energy, and potential energy  $E_p$  (red line) of a the same randomly selected trajectory of isomer 2b than presented in Figure S19.

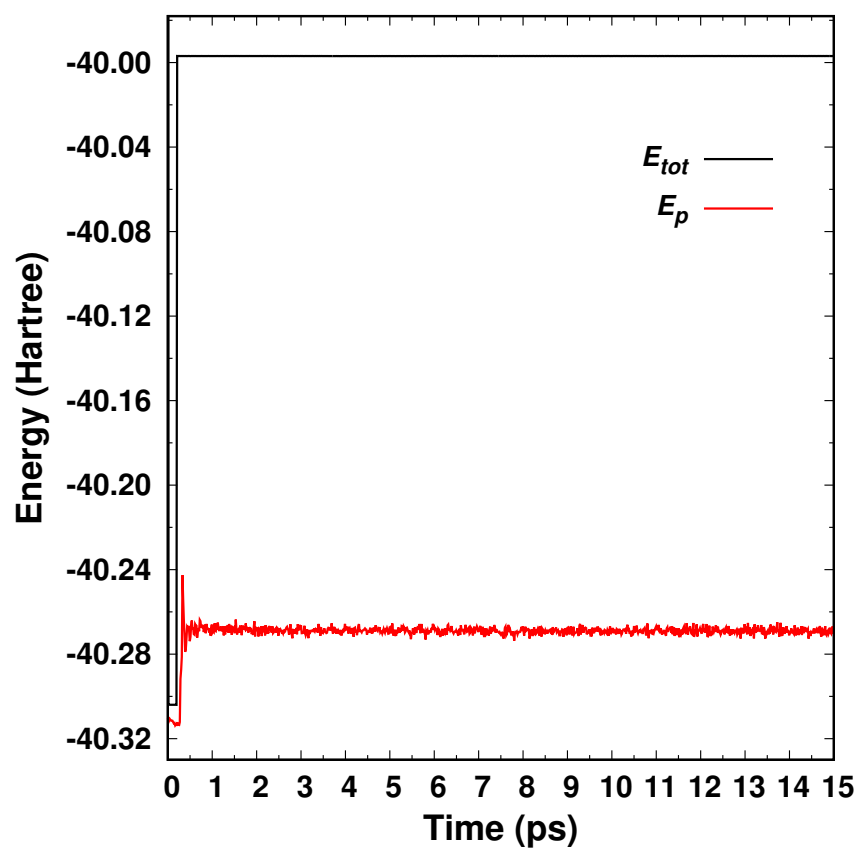

Figure S21 Total energy  $E_{tot}$  (black line) and potential energy  $E_p$  (red line) of a randomly selected trajectory of isomer 5d.

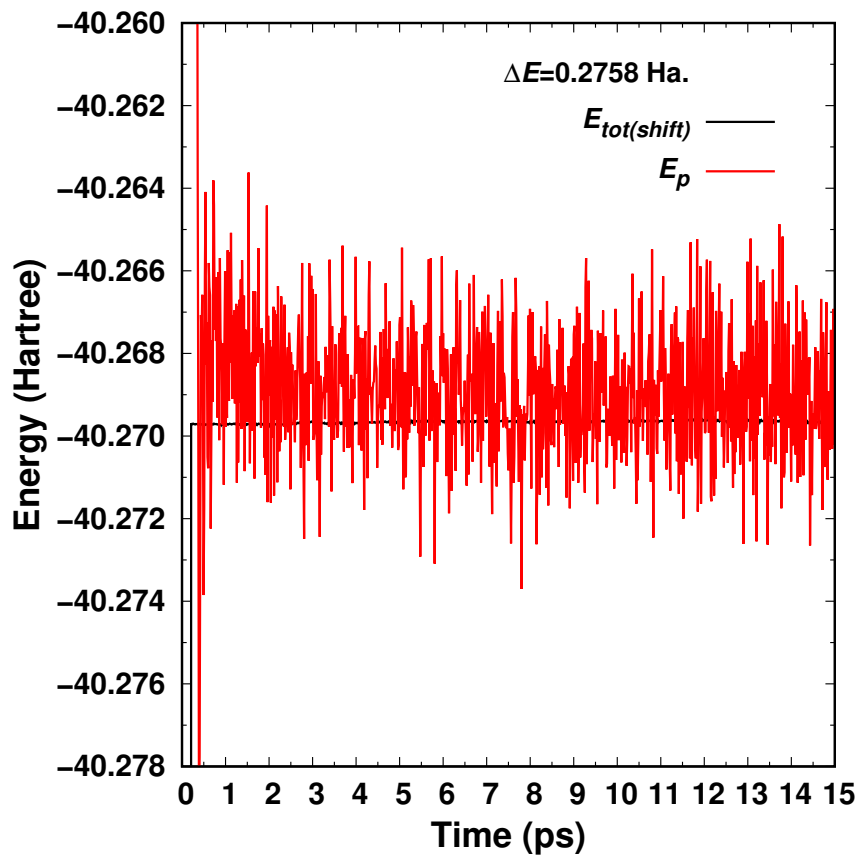

Figure S22 Shifted total energy  $E_{tot(shift)}$  (black line), pan down 0.2758 Hartree of the total energy, and potential energy  $E_p$  (red line) of a the same randomly selected trajectory of isomer 5d than presented in Figure S21.

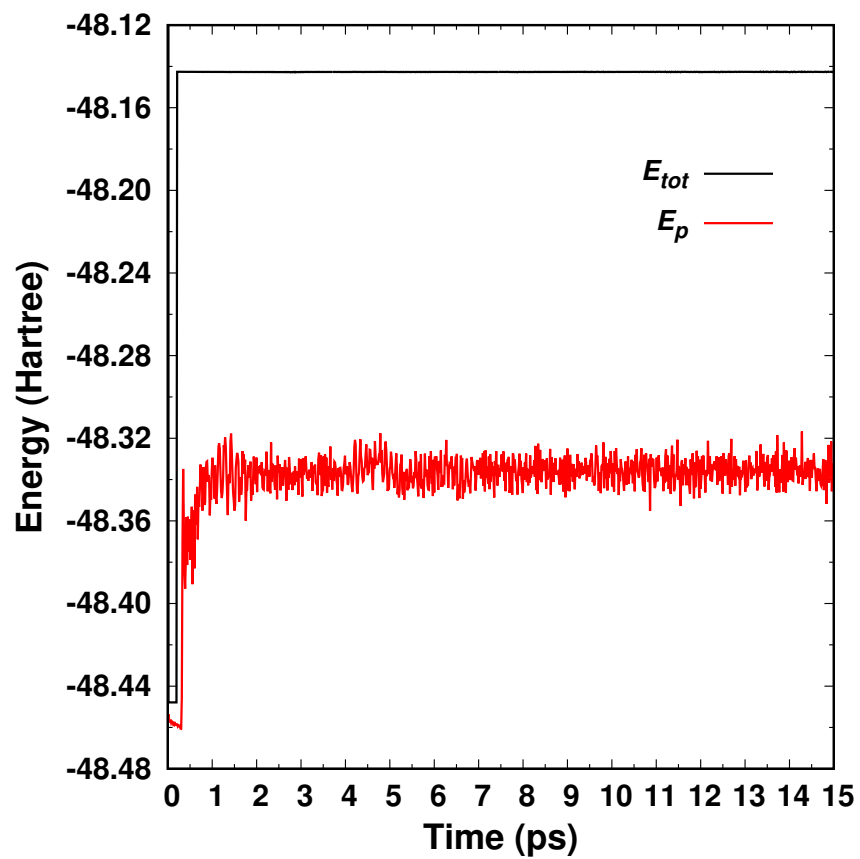

Figure S23 Total energy  $E_{tot}$  (black line) and potential energy  $E_p$  (red line) of a random selected trajectory of isomer 7d.

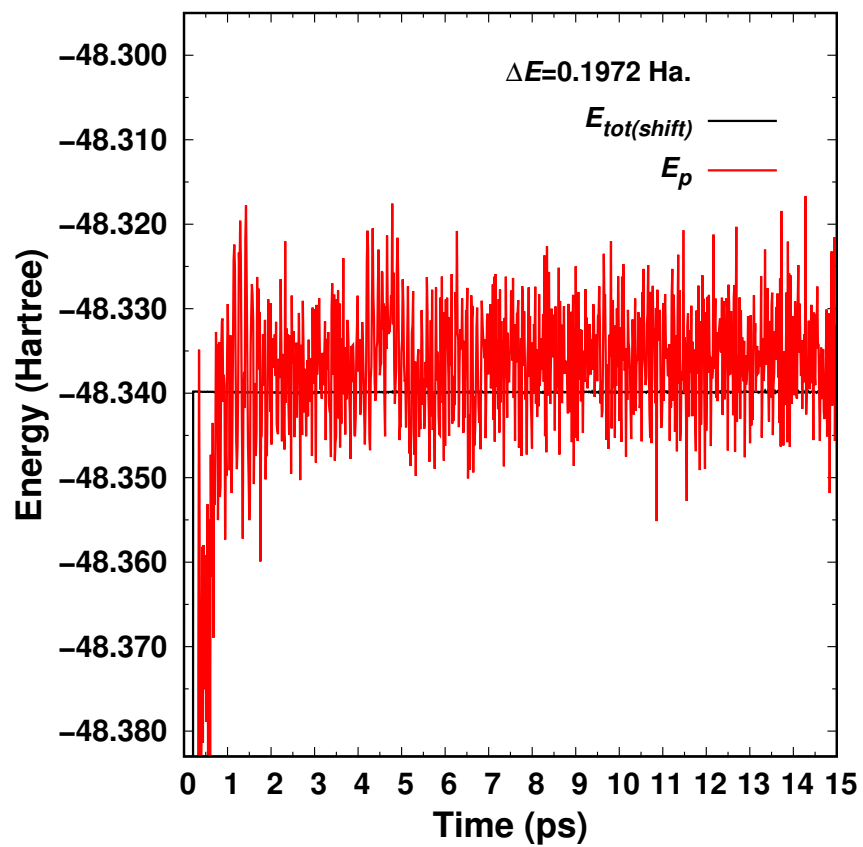

Figure S24 Shifted total energy  $E_{tot(shift)}$  (black line), pan down 0.1972 Hartree of the total energy, and potential energy  $E_p$  (red line) of a the same randomly selected trajectory of isomer 7d than presented in Figure S23.

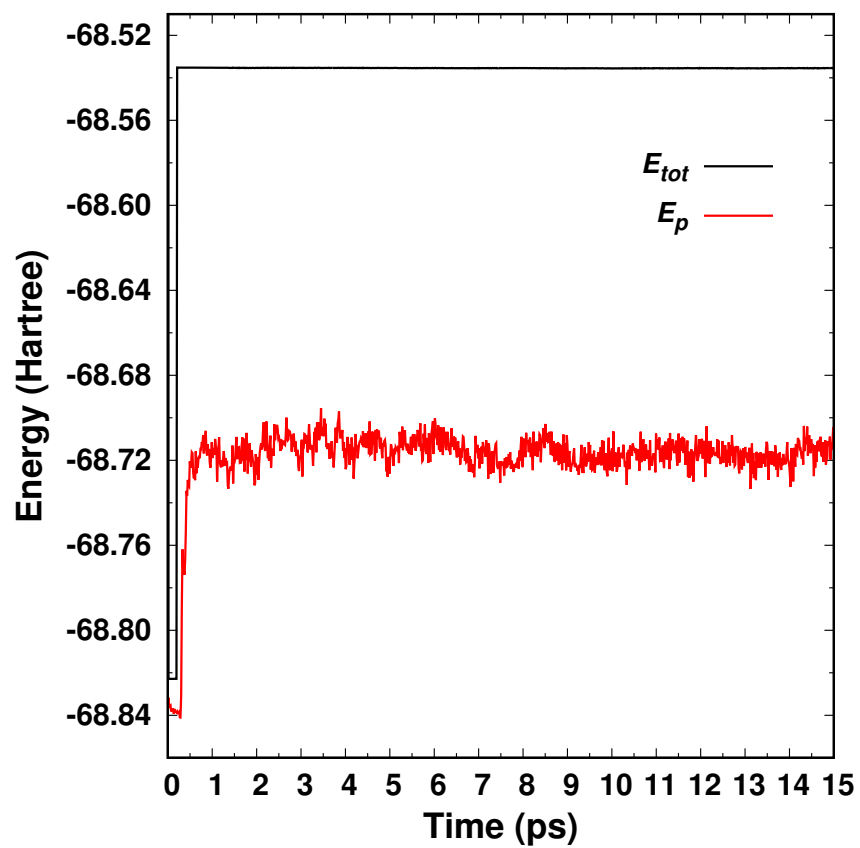

Figure S25 Total energy  $E_{tot}$  (black line) and potential energy  $E_p$  (red line) of a random selected trajectory of isomer 12c.

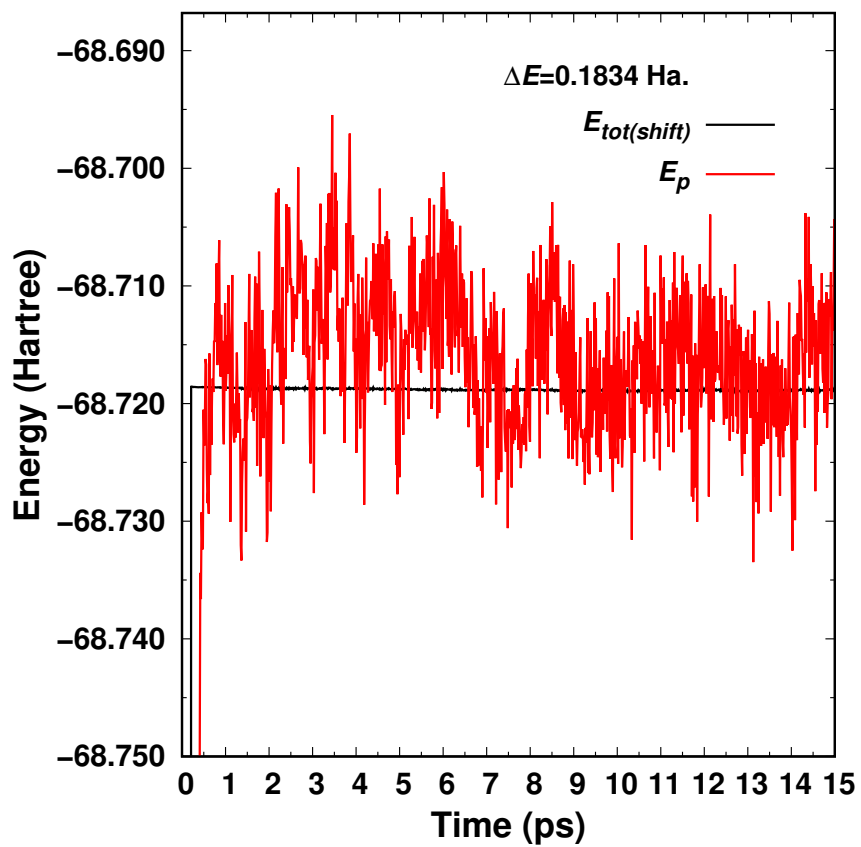

Figure S26 Shifted total energy  $E_{tot(shift)}$  (black line), pan down 0.1834 Hartree of the total energy, and potential energy  $E_p$  (red line) of a the same randomly selected trajectory of isomer 12c than presented in Figure S25.

## 7 Influence of Equilibration Time prior to Collision

Table S5  $P_{PU}$  (in %),  $P_{NUL}$  (in %),  $\sigma_{frag}$  (in Å<sup>2</sup>) of the first low-energy isomers of (H<sub>2</sub>O)<sub>1-7,11,12</sub>UH<sup>+</sup> clusters obtained from simulations consisting in 200 initial random orientations per impact parameter.  $t_{0.2ps}$  designates simulations with an equilibration time prior to collision of 0.2 ps.  $t_{2ps}$  designates simulations with an equilibration time prior to collision of 2.0 ps.  $P_{NUL_{exp}}$  and  $\sigma_{frag_{exp}}$  are the experimental values for  $P_{NUL}$  and  $\sigma_{frag}$ , respectively. For (H<sub>2</sub>O)<sub>12</sub>UH<sup>+</sup>, experimental values were obtained for collision with Ne, whereas all other theoretical and experimental data are for collision with Ar.

| Isomers | Simu | $t_{0.2ps}$<br>$P_{PU}$ | $t_{2ps}$<br>$P_{PU}$ | $t_{0.2ps}$<br>$P_{NUL}$ | $t_{2ps}$<br>$P_{NUL}$ | $P_{NUL_{exp}}$ | $t_{0.2ps}$<br>$\sigma_{frag}$ | $t_{2ps}$<br>$\sigma_{frag}$ | $\sigma_{frag_{exp}}$ |
|---------|------|-------------------------|-----------------------|--------------------------|------------------------|-----------------|--------------------------------|------------------------------|-----------------------|
| 1a      | 200  | 100                     | 100                   | 0.1                      | 0.5                    | 0.9             | 28.4                           | 29.0                         | 12.3                  |
| 2a      | 200  | 100                     | 100                   | 0.0                      | 0.4                    | 0.4             | 35.9                           | 37.4                         | 22.8                  |
| 3a      | 200  | 100                     | 100                   | 5.4                      | 6.7                    | 1.7             | 37.4                           | 38.53                        | 31.2                  |
| 4a      | 200  | 98.2                    | 99.2                  | 26.9                     | 28.7                   | 2.8             | 40.1                           | 43.5                         | 43.4                  |
| 5a      | 200  | 79.3                    | 78.5                  | 45.7                     | 43.0                   | 7.5             | 37.2                           | 39.9                         | 48.0                  |
| 6a      | 200  | 43.3                    | 43.6                  | 38.0                     | 38.4                   | 18.0            | 46.6                           | 48.4                         | 54.3                  |
| 7a      | 200  | 27.1                    | 30.1                  | 29.5                     | 31.9                   | 18.0            | 54.8                           | 57.6                         | 54.3                  |
| 11a     | 200  | 4.2                     | 4.9                   | 26.7                     | 29.9                   | 11.8            | 53.8                           | 56.6                         | 63.8                  |
| 12a     | 200  | 6.45                    | 6.34                  | 8.0                      | 9.0                    | 12.2            | 59.2                           | 65.1                         | 77.0                  |



## 8 Coordinates of Isomers

Table S6 Optimized Cartesian coordinates of 1a at MP2/Def2TZVP level. Electronic energy is equal to -490.77283 Hartree.

| Symbol | x         | y         | z         |
|--------|-----------|-----------|-----------|
| H      | 26.294494 | 28.036899 | 25.037455 |
| H      | 24.003324 | 24.527660 | 24.958922 |
| C      | 24.956798 | 25.032176 | 24.976864 |
| C      | 25.052011 | 26.392772 | 24.998859 |
| H      | 24.175839 | 27.029868 | 24.999342 |
| C      | 26.163160 | 24.304111 | 24.978498 |
| O      | 26.274285 | 23.018341 | 24.959860 |
| N      | 27.324587 | 24.976727 | 25.001251 |
| H      | 25.375313 | 22.542648 | 24.942934 |
| C      | 27.473791 | 26.372392 | 25.024363 |
| O      | 28.539373 | 26.922788 | 25.044210 |
| N      | 26.242384 | 27.023141 | 25.021269 |
| H      | 28.193913 | 24.445535 | 25.002328 |
| O      | 23.994477 | 21.850593 | 24.917577 |
| H      | 23.716709 | 21.322401 | 25.678546 |
| H      | 23.733027 | 21.346170 | 24.135006 |

Table S7 Optimized Cartesian coordinates of 1b at MP2/Def2TZVP level. Electronic energy is equal to -490.771635 Hartree.

| Symbol | x         | y         | z         |
|--------|-----------|-----------|-----------|
| H      | 28.236659 | 24.392567 | 24.962164 |
| H      | 24.044319 | 24.465897 | 25.072636 |
| C      | 24.991893 | 24.980172 | 25.035482 |
| C      | 25.086867 | 26.338845 | 25.001751 |
| H      | 24.212764 | 26.978391 | 25.010451 |
| C      | 26.193199 | 24.249964 | 25.020112 |
| O      | 26.170478 | 22.955644 | 25.050439 |
| N      | 27.359822 | 24.915408 | 24.973627 |
| H      | 27.092155 | 22.559874 | 25.034880 |
| C      | 27.507072 | 26.315257 | 24.937549 |
| O      | 28.577818 | 26.856582 | 24.896475 |
| N      | 26.281390 | 26.967126 | 24.955378 |
| H      | 26.334709 | 27.980579 | 24.930681 |
| O      | 28.700103 | 22.261830 | 24.998700 |
| H      | 29.082209 | 21.818365 | 24.227516 |
| H      | 29.123465 | 21.853775 | 25.767887 |

Table S8 Optimized Cartesian coordinates of 2a at MP2/Def2TZVP level. Electronic energy is equal to -567.1110192 Hartree.

| Symbol | x         | y         | z         |
|--------|-----------|-----------|-----------|
| H      | 23.673322 | 21.309237 | 25.752543 |
| H      | 23.941239 | 24.468078 | 24.988674 |
| C      | 24.878672 | 25.002026 | 24.989286 |
| C      | 24.932166 | 26.363355 | 24.987704 |
| H      | 24.039552 | 26.976791 | 24.985793 |
| C      | 26.111194 | 24.312555 | 24.991572 |
| O      | 26.244471 | 23.023508 | 24.993169 |
| N      | 27.252205 | 25.005072 | 24.992682 |
| H      | 28.177017 | 24.512233 | 24.989934 |
| C      | 27.350760 | 26.397493 | 24.990090 |
| O      | 28.402117 | 26.986107 | 24.989218 |
| N      | 26.108002 | 27.023644 | 24.988437 |
| H      | 26.136777 | 28.037799 | 24.986487 |
| O      | 29.812927 | 24.203270 | 24.939298 |
| H      | 30.379835 | 24.984769 | 24.957918 |
| H      | 25.355755 | 22.545386 | 24.990294 |
| O      | 23.947394 | 21.827128 | 24.983768 |
| H      | 30.388918 | 23.435867 | 25.029532 |
| H      | 23.680167 | 21.312433 | 24.210435 |

Table S9 Optimized Cartesian coordinates of 2b at MP2/Def2TZVP level. Electronic energy is equal to -567.1107287 Hartree.

| Symbol | x         | y         | z         |
|--------|-----------|-----------|-----------|
| H      | 31.204769 | 25.237452 | 25.198863 |
| H      | 24.086648 | 24.436308 | 25.034415 |
| C      | 25.012376 | 24.992349 | 25.020860 |
| C      | 25.035931 | 26.351639 | 25.002975 |
| H      | 24.148047 | 26.969434 | 25.001032 |
| C      | 26.268597 | 24.336662 | 25.019603 |
| O      | 26.301813 | 23.032339 | 25.033970 |
| N      | 27.420983 | 24.998925 | 25.004394 |
| H      | 29.914706 | 24.364238 | 25.043870 |
| C      | 27.393606 | 26.318633 | 24.986171 |
| O      | 28.477991 | 27.023833 | 24.969020 |
| N      | 26.230252 | 27.006147 | 24.985285 |
| H      | 26.274384 | 28.020376 | 24.969037 |
| O      | 30.300421 | 25.235670 | 24.863550 |
| H      | 29.274416 | 26.380928 | 24.956184 |
| H      | 29.168496 | 21.632783 | 25.698177 |
| O      | 28.923885 | 22.257605 | 25.000758 |
| H      | 27.252632 | 22.730555 | 25.025325 |
| H      | 29.193287 | 21.826412 | 24.177190 |

Table S10 Optimized Cartesian coordinates of 3a at MP2/Def2TZVP level. Electronic energy is equal to -643.4491802 Hartree.

| Symbol | x         | y         | z         |
|--------|-----------|-----------|-----------|
| H      | 29.310188 | 22.306065 | 24.923478 |
| H      | 24.239998 | 24.526356 | 25.202060 |
| C      | 25.175725 | 25.047598 | 25.073131 |
| C      | 25.239164 | 26.384857 | 24.850351 |
| H      | 24.356565 | 27.009526 | 24.795380 |
| C      | 26.393007 | 24.326916 | 25.114568 |
| O      | 26.377267 | 23.060161 | 25.301663 |
| N      | 27.549142 | 25.004679 | 24.961316 |
| H      | 28.470518 | 24.534531 | 25.086758 |
| C      | 27.649426 | 26.374411 | 24.710414 |
| O      | 28.709266 | 26.937908 | 24.548792 |
| N      | 26.427375 | 27.013803 | 24.671460 |
| H      | 26.466925 | 28.011875 | 24.496530 |
| O      | 28.465819 | 21.851053 | 24.725925 |
| H      | 31.815325 | 25.713749 | 23.009190 |
| H      | 27.278597 | 22.554068 | 25.127878 |
| O      | 31.002258 | 25.514327 | 23.486126 |
| H      | 30.596359 | 24.401704 | 24.637116 |
| H      | 30.541070 | 26.350974 | 23.639913 |
| O      | 30.088099 | 23.872809 | 25.308592 |
| H      | 28.576827 | 20.898372 | 24.825121 |
| H      | 30.558667 | 23.980226 | 26.145316 |

Table S11 Optimized Cartesian coordinates of 3b at MP2/Def2TZVP level. Electronic energy is equal to -643.4487627 Hartree.

| Symbol | x         | y         | z         |
|--------|-----------|-----------|-----------|
| H      | 29.334994 | 26.311976 | 25.041431 |
| H      | 24.100090 | 24.540399 | 24.934385 |
| C      | 25.043103 | 25.065954 | 24.957114 |
| C      | 25.116305 | 26.425975 | 24.962076 |
| H      | 24.251153 | 27.075541 | 24.943887 |
| C      | 26.274604 | 24.372256 | 24.981758 |
| O      | 26.269154 | 23.062719 | 24.975613 |
| N      | 27.446333 | 24.997232 | 25.010942 |
| H      | 27.209331 | 22.739933 | 24.989133 |
| C      | 27.455945 | 26.319643 | 25.013657 |
| O      | 28.572064 | 26.983728 | 25.040149 |
| N      | 26.323408 | 27.047036 | 24.990019 |
| H      | 26.369407 | 28.084355 | 24.990071 |
| O      | 28.897553 | 22.220097 | 24.999887 |
| H      | 29.105311 | 21.568730 | 25.684487 |
| H      | 29.177748 | 21.806023 | 24.171425 |
| O      | 30.333554 | 25.100955 | 24.961699 |
| H      | 29.887496 | 24.252037 | 25.109637 |
| H      | 31.217022 | 25.040256 | 25.342928 |
| O      | 26.042846 | 29.769393 | 24.971371 |
| H      | 26.131360 | 30.348279 | 25.738479 |
| H      | 26.183501 | 30.335346 | 24.202351 |

Table S12 Optimized Cartesian coordinates of 4a at MP2/Def2TZVP level. Electronic energy is equal to -719.7870304 Hartree.

| Symbol | x         | y         | z         |
|--------|-----------|-----------|-----------|
| H      | 29.987210 | 25.683685 | 25.020579 |
| H      | 24.031466 | 24.491626 | 25.082263 |
| C      | 24.981777 | 25.001190 | 25.045088 |
| C      | 25.067066 | 26.350638 | 25.036919 |
| H      | 24.194149 | 26.990088 | 25.064412 |
| C      | 26.189893 | 24.227622 | 25.013927 |
| O      | 26.221831 | 22.987179 | 25.049492 |
| N      | 27.354300 | 24.960691 | 24.938645 |
| H      | 28.245004 | 24.470037 | 24.858252 |
| C      | 27.475745 | 26.339039 | 24.959805 |
| O      | 28.554054 | 26.910358 | 24.946028 |
| N      | 26.271259 | 26.995071 | 25.000809 |
| H      | 26.323723 | 28.006011 | 25.012032 |
| O      | 27.560898 | 19.127225 | 26.295373 |
| H      | 27.776876 | 18.344608 | 25.773968 |
| H      | 26.810242 | 18.887530 | 26.851699 |
| O      | 29.704103 | 22.919690 | 26.892424 |
| H      | 30.278778 | 22.711706 | 27.637068 |
| H      | 28.840218 | 21.960694 | 26.109492 |
| O      | 30.272501 | 24.747283 | 25.000758 |
| H      | 30.133815 | 23.616720 | 26.351377 |
| H      | 30.989026 | 24.694736 | 24.356464 |
| O      | 28.188715 | 21.493264 | 25.474265 |
| H      | 27.907847 | 20.585835 | 25.802159 |
| H      | 27.378981 | 22.110175 | 25.284398 |

Table S13 Optimized Cartesian coordinates of 4b at MP2/Def2TZVP level. Electronic energy is equal to -719.7856381 Hartree.

| Symbol | x         | y         | z         |
|--------|-----------|-----------|-----------|
| H      | 27.222070 | 22.640488 | 24.853616 |
| H      | 24.160856 | 24.535037 | 25.183568 |
| C      | 25.090987 | 25.079448 | 25.139397 |
| C      | 25.145079 | 26.438478 | 25.109414 |
| H      | 24.257786 | 27.059100 | 25.135728 |
| C      | 26.313620 | 24.377925 | 25.089772 |
| O      | 26.318135 | 23.093081 | 25.097967 |
| N      | 27.460703 | 25.086390 | 25.043510 |
| H      | 28.383373 | 24.614056 | 25.112222 |
| C      | 27.540332 | 26.481141 | 24.991509 |
| O      | 28.600910 | 27.068982 | 24.922408 |
| N      | 26.317187 | 27.105841 | 25.032478 |
| H      | 26.304938 | 28.139002 | 25.003253 |
| O      | 30.913325 | 25.862524 | 23.756531 |
| H      | 25.872066 | 30.407982 | 25.737356 |
| H      | 31.726014 | 26.215071 | 23.378801 |
| O      | 25.760276 | 29.805949 | 24.991508 |
| H      | 25.757189 | 30.367734 | 24.206938 |
| H      | 30.479889 | 23.912954 | 26.136520 |
| O      | 30.030657 | 23.929326 | 25.281990 |
| H      | 30.365934 | 26.612675 | 24.034114 |
| H      | 30.541335 | 24.564876 | 24.713834 |
| O      | 28.441253 | 22.021176 | 24.344300 |
| H      | 28.570000 | 21.067963 | 24.281579 |
| H      | 29.274565 | 22.447499 | 24.631855 |

Table S14 Optimized Cartesian coordinates of 5a at MP2/Def2TZVP level. Electronic energy is equal to -796.125622 Hartree.

| Symbol | x         | y         | z         |
|--------|-----------|-----------|-----------|
| H      | 31.014571 | 25.368894 | 23.406352 |
| H      | 24.100728 | 24.467433 | 24.759873 |
| C      | 25.032332 | 25.005663 | 24.844897 |
| C      | 25.069039 | 26.352630 | 24.923150 |
| H      | 24.177068 | 26.965373 | 24.906981 |
| C      | 26.266917 | 24.263104 | 24.870489 |
| O      | 26.358566 | 23.039817 | 24.780676 |
| N      | 27.410500 | 25.046505 | 25.013215 |
| H      | 28.299488 | 24.558423 | 25.131701 |
| C      | 27.474054 | 26.417350 | 25.058884 |
| O      | 28.529996 | 27.038022 | 25.131768 |
| N      | 26.254033 | 27.034732 | 25.020082 |
| H      | 26.272254 | 28.045515 | 25.059552 |
| O      | 29.585573 | 23.032666 | 21.953247 |
| H      | 29.693787 | 22.681090 | 21.062363 |
| H      | 29.135956 | 22.354057 | 22.496869 |
| O      | 30.644033 | 26.761579 | 23.473776 |
| H      | 29.929615 | 26.976214 | 24.114455 |
| H      | 31.292932 | 27.474252 | 23.493960 |
| O      | 29.939546 | 23.345607 | 25.459698 |
| H      | 30.269029 | 23.185051 | 26.353400 |
| H      | 29.526199 | 22.508977 | 25.140541 |
| O      | 31.196249 | 24.341098 | 23.405722 |
| H      | 30.885407 | 23.968899 | 24.282779 |
| H      | 30.629901 | 23.858859 | 22.705744 |
| O      | 28.482504 | 21.591730 | 24.051409 |
| H      | 28.344769 | 20.637738 | 24.112285 |
| H      | 27.623053 | 22.017027 | 24.299312 |

Table S15 Optimized Cartesian coordinates of 5b at MP2/Def2TZVP level. Electronic energy is equal to -796.1251968 Hartree.

| Symbol | x         | y         | z         |
|--------|-----------|-----------|-----------|
| H      | 28.549578 | 22.410509 | 23.117682 |
| H      | 24.055962 | 24.567324 | 24.805097 |
| C      | 25.031829 | 25.019904 | 24.892841 |
| C      | 25.193691 | 26.359551 | 24.958582 |
| H      | 24.362268 | 27.052066 | 24.933920 |
| C      | 26.193798 | 24.175072 | 24.915489 |
| O      | 26.168524 | 22.943898 | 24.798547 |
| N      | 27.399018 | 24.837712 | 25.084270 |
| H      | 28.239274 | 24.276390 | 25.251965 |
| C      | 27.593359 | 26.199645 | 25.099125 |
| O      | 28.703900 | 26.716610 | 25.155703 |
| N      | 26.436104 | 26.928329 | 25.045869 |
| H      | 26.549382 | 27.933973 | 25.064469 |
| O      | 29.972691 | 23.546077 | 25.956355 |
| H      | 30.106412 | 23.845833 | 26.865453 |
| H      | 30.538612 | 24.121169 | 25.401179 |
| O      | 29.211168 | 23.632973 | 22.413401 |
| H      | 29.357732 | 23.655948 | 21.460919 |
| H      | 29.851092 | 24.247132 | 22.829094 |
| O      | 29.650514 | 20.877917 | 25.405700 |
| H      | 30.062407 | 21.688745 | 25.758001 |
| H      | 30.288899 | 20.156895 | 25.427405 |
| O      | 28.062031 | 21.698082 | 23.645458 |
| H      | 27.294848 | 22.146557 | 24.151563 |
| H      | 28.709816 | 21.265715 | 24.312920 |
| O      | 30.734840 | 25.316421 | 24.012086 |
| H      | 30.114762 | 25.992609 | 24.369423 |
| H      | 31.546559 | 25.781357 | 23.772541 |

Table S16 Optimized Cartesian coordinates of 5c at MP2/Def2TZVP level. Electronic energy is equal to -796.1224153 Hartree.

| Symbol | x         | y         | z         |
|--------|-----------|-----------|-----------|
| H      | 30.067484 | 22.349930 | 24.178715 |
| H      | 24.013222 | 24.466874 | 25.101273 |
| C      | 24.953020 | 24.996170 | 25.078364 |
| C      | 25.011124 | 26.345679 | 25.078343 |
| H      | 24.127598 | 26.970557 | 25.100340 |
| C      | 26.176819 | 24.242738 | 25.049748 |
| O      | 26.215497 | 23.005219 | 25.042998 |
| N      | 27.335688 | 24.991958 | 25.033185 |
| H      | 28.236485 | 24.497385 | 25.046997 |
| C      | 27.423314 | 26.370759 | 25.019297 |
| O      | 28.480883 | 26.978212 | 24.988486 |
| N      | 26.205377 | 27.006497 | 25.047774 |
| H      | 26.243856 | 28.017592 | 25.041518 |
| O      | 27.627627 | 20.910523 | 24.841951 |
| H      | 27.113152 | 21.782133 | 24.927993 |
| H      | 27.074370 | 20.210138 | 24.386157 |
| O      | 30.830953 | 25.982714 | 23.887717 |
| H      | 30.154683 | 26.605817 | 24.206132 |
| H      | 31.639472 | 26.481848 | 23.732637 |
| O      | 30.057122 | 23.799252 | 25.088790 |
| H      | 30.433279 | 23.751778 | 25.977088 |
| H      | 30.501224 | 24.577292 | 24.651164 |
| O      | 29.762872 | 21.523874 | 23.730831 |
| H      | 30.526384 | 20.954010 | 23.586799 |
| H      | 28.533092 | 21.075865 | 24.357416 |
| O      | 26.281506 | 19.007429 | 23.710992 |
| H      | 25.957291 | 18.247961 | 24.209408 |
| H      | 25.762984 | 19.046260 | 22.899009 |

Table S17 Optimized Cartesian coordinates of 5d at MP2/Def2TZVP level. Electronic energy is equal to -796.1217798 Hartree.

| Symbol | x         | y         | z         |
|--------|-----------|-----------|-----------|
| H      | 29.556586 | 22.922527 | 26.364223 |
| H      | 24.143285 | 24.478148 | 24.903351 |
| C      | 25.072061 | 25.027802 | 24.935910 |
| C      | 25.110457 | 26.386356 | 24.965506 |
| H      | 24.232310 | 27.018197 | 24.959447 |
| C      | 26.318488 | 24.353980 | 24.945599 |
| O      | 26.313241 | 23.052824 | 24.912304 |
| N      | 27.483637 | 25.004039 | 24.986468 |
| H      | 31.473637 | 25.948723 | 25.319898 |
| C      | 27.453874 | 26.324568 | 25.016789 |
| O      | 28.541948 | 27.038181 | 25.060059 |
| N      | 26.305479 | 27.028849 | 25.005263 |
| H      | 26.330381 | 28.063025 | 25.029932 |
| O      | 29.992157 | 23.630737 | 26.873020 |
| H      | 29.356543 | 26.433636 | 25.093269 |
| H      | 27.254905 | 22.690807 | 24.901091 |
| O      | 30.013096 | 23.592440 | 23.121341 |
| H      | 30.378481 | 24.341271 | 23.624249 |
| H      | 30.627335 | 23.409602 | 22.402077 |
| O      | 30.631559 | 25.508172 | 25.147040 |
| H      | 30.469175 | 23.207018 | 27.594807 |
| H      | 30.502238 | 24.834888 | 25.871385 |
| O      | 25.902135 | 29.751898 | 25.059251 |
| H      | 25.955059 | 30.313522 | 25.842039 |
| H      | 25.990011 | 30.349001 | 24.306437 |
| O      | 28.744976 | 22.069112 | 24.871025 |
| H      | 28.802983 | 21.117520 | 24.715748 |
| H      | 29.247405 | 22.513684 | 24.137092 |



Table S18 Optimized Cartesian coordinates of 6a at MP2/Def2TZVP level. Electronic energy is equal to -872.4593536 Hartree.

| Symbol | x         | y         | z         |
|--------|-----------|-----------|-----------|
| H      | 33.452909 | 25.090349 | 20.389350 |
| H      | 24.097060 | 24.537649 | 24.789243 |
| C      | 25.035927 | 25.063832 | 24.868963 |
| C      | 25.090248 | 26.410429 | 24.951716 |
| H      | 24.205306 | 27.033571 | 24.944536 |
| C      | 26.262688 | 24.307593 | 24.882951 |
| O      | 26.340715 | 23.083126 | 24.776004 |
| N      | 27.414809 | 25.073079 | 25.031235 |
| H      | 28.296236 | 24.568160 | 25.165651 |
| C      | 27.497732 | 26.444470 | 25.072084 |
| O      | 28.560205 | 27.053759 | 25.128376 |
| N      | 26.283006 | 27.078035 | 25.040211 |
| H      | 26.315133 | 28.088399 | 25.079292 |
| O      | 29.205554 | 23.027678 | 21.486326 |
| H      | 28.923088 | 22.519546 | 22.276948 |
| H      | 28.620219 | 22.781907 | 20.762036 |
| O      | 28.509310 | 21.806873 | 23.860763 |
| H      | 27.656405 | 22.169668 | 24.212880 |
| H      | 28.436905 | 20.845022 | 23.908111 |
| O      | 30.706945 | 25.787758 | 23.999590 |
| H      | 30.034423 | 26.381733 | 24.404711 |
| H      | 30.671709 | 24.971883 | 24.538787 |
| O      | 30.404889 | 25.287297 | 21.628514 |
| H      | 30.546431 | 25.528614 | 22.669763 |
| H      | 29.941999 | 24.393602 | 21.529140 |
| O      | 32.572868 | 25.421371 | 20.176122 |
| H      | 32.695665 | 26.118875 | 19.521564 |
| H      | 31.253728 | 25.320232 | 21.105393 |
| O      | 29.929566 | 23.553996 | 25.410123 |
| H      | 30.254249 | 23.283576 | 26.277945 |
| H      | 29.637378 | 22.739125 | 24.949875 |

Table S19 Optimized Cartesian coordinates of 6b at MP2/Def2TZVP level. Electronic energy is equal to -872.4589692 Hartree.

| Symbol | x         | y         | z         |
|--------|-----------|-----------|-----------|
| H      | 30.259138 | 24.364446 | 20.928069 |
| H      | 24.020577 | 24.507524 | 25.099527 |
| C      | 24.965701 | 25.024872 | 25.039532 |
| C      | 25.035088 | 26.370730 | 24.956770 |
| H      | 24.157507 | 27.004135 | 24.947506 |
| C      | 26.183597 | 24.256384 | 25.036240 |
| O      | 26.243516 | 23.026600 | 25.079696 |
| N      | 27.350157 | 25.009848 | 24.987271 |
| H      | 28.237818 | 24.505564 | 25.078064 |
| C      | 27.444732 | 26.375836 | 24.877086 |
| O      | 28.509004 | 26.978864 | 24.793207 |
| N      | 26.236046 | 27.021493 | 24.870174 |
| H      | 26.279854 | 28.029287 | 24.793781 |
| O      | 27.421477 | 21.317376 | 23.444848 |
| H      | 28.529838 | 21.650494 | 23.370974 |
| H      | 26.933821 | 21.877620 | 24.100232 |
| O      | 26.971490 | 18.741816 | 23.788186 |
| H      | 27.266564 | 20.353168 | 23.618706 |
| H      | 26.483805 | 18.216099 | 23.144123 |
| O      | 29.978664 | 24.241116 | 21.841356 |
| H      | 27.222592 | 18.140905 | 24.498220 |
| H      | 30.401898 | 24.943720 | 22.368975 |
| O      | 30.849796 | 25.925977 | 23.922316 |
| H      | 30.072589 | 26.460241 | 24.204554 |
| H      | 31.614648 | 26.513812 | 23.952651 |
| O      | 30.051060 | 23.787739 | 25.377058 |
| H      | 30.578889 | 24.533319 | 25.013321 |
| H      | 30.373554 | 23.628780 | 26.272924 |
| O      | 29.696779 | 22.063546 | 23.304280 |
| H      | 29.819629 | 22.774292 | 22.618570 |
| H      | 29.945721 | 22.505337 | 24.146948 |

Table S20 Optimized Cartesian coordinates of 6c at MP2/Def2TZVP level. Electronic energy is equal to -872.4589455 Hartree.

| Symbol | x         | y         | z         |
|--------|-----------|-----------|-----------|
| H      | 33.256113 | 28.811894 | 24.266165 |
| H      | 24.098032 | 24.410678 | 24.678200 |
| C      | 25.022738 | 24.956747 | 24.785278 |
| C      | 25.047914 | 26.304446 | 24.848412 |
| H      | 24.153098 | 26.911092 | 24.797533 |
| C      | 26.261493 | 24.222573 | 24.857577 |
| O      | 26.360347 | 22.998872 | 24.786687 |
| N      | 27.395847 | 25.014206 | 25.024269 |
| H      | 28.286694 | 24.532353 | 25.169003 |
| C      | 27.448097 | 26.385053 | 25.058420 |
| O      | 28.495713 | 27.015934 | 25.159771 |
| N      | 26.225262 | 26.994683 | 24.974411 |
| H      | 26.236924 | 28.005569 | 25.004588 |
| O      | 31.181185 | 24.494116 | 23.468657 |
| H      | 30.945549 | 25.603286 | 23.473646 |
| H      | 30.649416 | 23.995535 | 22.776594 |
| O      | 29.572430 | 23.090785 | 22.004100 |
| H      | 29.162808 | 22.388480 | 22.545997 |
| H      | 29.659402 | 22.752202 | 21.106393 |
| O      | 32.554938 | 28.678253 | 23.619069 |
| H      | 32.725074 | 29.302310 | 22.904645 |
| H      | 29.533805 | 22.539625 | 25.189947 |
| O      | 30.622991 | 26.833655 | 23.490305 |
| H      | 29.906844 | 27.025212 | 24.134107 |
| H      | 31.339954 | 27.505603 | 23.576396 |
| O      | 29.897828 | 23.389944 | 25.528443 |
| H      | 30.198457 | 23.231077 | 26.432040 |
| H      | 30.894618 | 24.095568 | 24.329329 |
| O      | 28.523629 | 21.572737 | 24.099214 |
| H      | 27.653194 | 21.978061 | 24.335355 |
| H      | 28.407451 | 20.616203 | 24.157565 |

Table S21 Optimized Cartesian coordinates of 6d at MP2/Def2TZVP level. Electronic energy is equal to -872.4578704 Hartree.

| Symbol | x         | y         | z         |
|--------|-----------|-----------|-----------|
| H      | 29.978188 | 29.229288 | 26.092945 |
| H      | 24.581259 | 24.746107 | 26.498289 |
| C      | 25.543164 | 25.040797 | 26.106954 |
| C      | 25.999605 | 26.304608 | 26.220971 |
| H      | 25.435740 | 27.090769 | 26.705903 |
| C      | 26.367446 | 24.045073 | 25.466861 |
| O      | 26.087871 | 22.858591 | 25.340604 |
| N      | 27.584686 | 24.539408 | 24.971397 |
| H      | 28.193865 | 23.860209 | 24.515261 |
| C      | 28.053912 | 25.815117 | 25.076651 |
| O      | 29.154948 | 26.163841 | 24.626452 |
| N      | 27.221228 | 26.679921 | 25.719598 |
| H      | 27.590504 | 27.611855 | 25.882329 |
| O      | 31.293066 | 24.523346 | 24.346157 |
| H      | 30.167608 | 26.436435 | 28.803497 |
| H      | 29.948866 | 21.412228 | 27.607315 |
| O      | 31.225096 | 24.181715 | 26.858650 |
| H      | 31.369506 | 24.335489 | 25.863703 |
| H      | 30.636511 | 23.337747 | 26.977815 |
| O      | 29.568133 | 28.360872 | 26.189120 |
| H      | 27.492103 | 21.853246 | 24.893417 |
| H      | 32.019186 | 24.667031 | 23.729119 |
| O      | 29.738390 | 22.184368 | 27.070650 |
| H      | 29.300948 | 21.873442 | 26.241352 |
| H      | 29.712528 | 27.876267 | 25.356230 |
| O      | 30.047192 | 26.226112 | 27.870000 |
| H      | 30.784367 | 24.997506 | 27.270540 |
| H      | 29.974634 | 27.079073 | 27.391279 |
| O      | 28.461279 | 21.747971 | 24.761063 |
| H      | 30.582474 | 25.167101 | 24.152435 |
| H      | 28.587550 | 21.035737 | 24.122792 |

Table S22 Optimized Cartesian coordinates of 6e at MP2/Def2TZVP level. Electronic energy is equal to -872.4553511 Hartree.

| Symbol | x         | y         | z         |
|--------|-----------|-----------|-----------|
| H      | 30.863119 | 21.346506 | 29.380512 |
| H      | 23.979347 | 24.492890 | 24.554268 |
| C      | 24.910156 | 25.029307 | 24.654120 |
| C      | 24.959774 | 26.378558 | 24.631758 |
| H      | 24.078675 | 26.995808 | 24.512503 |
| C      | 26.130464 | 24.284384 | 24.823406 |
| O      | 26.192454 | 23.052600 | 24.868811 |
| N      | 27.278989 | 25.051361 | 24.928517 |
| H      | 28.177387 | 24.556434 | 24.981783 |
| C      | 27.355548 | 26.427351 | 24.920030 |
| O      | 28.401637 | 27.048358 | 25.035473 |
| N      | 26.141659 | 27.051844 | 24.765563 |
| H      | 26.171811 | 28.062863 | 24.755068 |
| O      | 26.655391 | 18.739316 | 25.156404 |
| H      | 27.104676 | 20.224667 | 25.708607 |
| H      | 26.001861 | 18.185880 | 25.599052 |
| O      | 27.384461 | 21.089106 | 26.108758 |
| H      | 26.949106 | 21.843316 | 25.623651 |
| H      | 28.507219 | 21.226406 | 26.157177 |
| O      | 29.984830 | 23.822726 | 24.986114 |
| H      | 30.391564 | 23.775027 | 24.111492 |
| H      | 30.416191 | 24.595816 | 25.442068 |
| O      | 30.680035 | 26.014651 | 26.230308 |
| H      | 31.475890 | 26.539126 | 26.366287 |
| H      | 29.995344 | 26.611125 | 25.874599 |
| O      | 31.094121 | 21.071667 | 28.486386 |
| H      | 31.808059 | 20.430945 | 28.579362 |
| H      | 26.729766 | 18.404265 | 24.255824 |
| O      | 29.763142 | 21.433126 | 26.175055 |
| H      | 30.225710 | 21.317418 | 27.036457 |
| H      | 29.980805 | 22.321560 | 25.801523 |

Table S23 Optimized Cartesian coordinates of 6f at MP2/Def2TZVP level. Electronic energy is equal to -872.4551165 Hartree.

| Symbol | x         | y         | z         |
|--------|-----------|-----------|-----------|
| H      | 30.695793 | 20.931623 | 26.172193 |
| H      | 24.126474 | 24.463034 | 24.982417 |
| C      | 25.066838 | 24.991570 | 24.975421 |
| C      | 25.131232 | 26.342857 | 25.004585 |
| H      | 24.250885 | 26.972439 | 25.037212 |
| C      | 26.287417 | 24.241084 | 24.930597 |
| O      | 26.327227 | 23.000453 | 24.904126 |
| N      | 27.443774 | 24.991340 | 24.914512 |
| H      | 28.342042 | 24.499062 | 24.849367 |
| C      | 27.528641 | 26.372576 | 24.956002 |
| O      | 28.594791 | 26.972224 | 24.951615 |
| N      | 26.318036 | 27.008764 | 24.997229 |
| H      | 26.319181 | 28.035167 | 25.025493 |
| O      | 27.763707 | 20.940754 | 24.973922 |
| H      | 27.242196 | 21.820302 | 24.938397 |
| H      | 27.220504 | 20.225031 | 25.414536 |
| O      | 30.968639 | 25.963358 | 25.913431 |
| H      | 30.248300 | 26.557695 | 25.631290 |
| H      | 31.768742 | 26.491956 | 25.996405 |
| O      | 25.738551 | 29.749185 | 25.071614 |
| H      | 25.805314 | 30.344243 | 24.315470 |
| H      | 25.813912 | 30.315600 | 25.848602 |
| O      | 26.433675 | 18.997650 | 26.073953 |
| H      | 26.093826 | 18.258986 | 25.555181 |
| H      | 25.899950 | 19.038006 | 26.875966 |
| O      | 29.930580 | 21.506276 | 26.061134 |
| H      | 30.224250 | 22.335912 | 25.612394 |
| H      | 28.676451 | 21.082071 | 25.445458 |
| O      | 30.178182 | 23.788457 | 24.714058 |
| H      | 30.632805 | 24.566688 | 25.140885 |
| H      | 30.513764 | 23.754376 | 23.809358 |

Table S24 Optimized Cartesian coordinates of 7a at MP2/Def2TZVP level. Electronic energy is equal to -948.7923666 Hartree.

| Symbol | x         | y         | z         |
|--------|-----------|-----------|-----------|
| H      | 30.213970 | 26.348420 | 25.840746 |
| H      | 24.100219 | 24.323774 | 25.466091 |
| C      | 25.022915 | 24.881795 | 25.422272 |
| C      | 25.068602 | 26.197279 | 25.729948 |
| H      | 24.192638 | 26.758905 | 26.028395 |
| C      | 26.234951 | 24.215825 | 25.030323 |
| O      | 26.310568 | 23.013840 | 24.725747 |
| N      | 27.364739 | 25.004061 | 25.001303 |
| H      | 28.250895 | 24.567237 | 24.704236 |
| C      | 27.445642 | 26.340030 | 25.337219 |
| O      | 28.486083 | 26.976378 | 25.327362 |
| N      | 26.237040 | 26.899463 | 25.685744 |
| H      | 26.267324 | 27.880983 | 25.929649 |
| O      | 24.507767 | 21.104043 | 25.555375 |
| H      | 27.431396 | 19.629797 | 26.844532 |
| H      | 25.041633 | 21.804203 | 25.128747 |
| O      | 28.586784 | 21.452764 | 24.835460 |
| H      | 25.636510 | 19.535060 | 28.009252 |
| H      | 29.290900 | 22.130162 | 24.780690 |
| O      | 25.978581 | 19.519185 | 27.108960 |
| H      | 29.185196 | 16.824119 | 25.195352 |
| H      | 23.909501 | 20.760601 | 24.882775 |
| O      | 28.426930 | 19.726836 | 26.595321 |
| H      | 28.541693 | 20.470709 | 25.858659 |
| H      | 30.166409 | 16.988837 | 26.377495 |
| O      | 29.919841 | 23.795400 | 24.378596 |
| H      | 30.305856 | 23.870545 | 23.497138 |
| H      | 30.456075 | 24.391420 | 24.960823 |
| O      | 29.504890 | 17.453030 | 25.851967 |
| H      | 28.803110 | 18.855526 | 26.294777 |
| H      | 27.760332 | 21.964135 | 24.707086 |
| O      | 30.860363 | 25.640996 | 26.009025 |
| H      | 25.374020 | 20.073398 | 26.552612 |
| H      | 31.690155 | 26.062249 | 26.255428 |

Table S25 Optimized Cartesian coordinates of 7b at MP2/Def2TZVP level. Electronic energy is equal to -948.7918168 Hartree.

| Symbol | x         | y         | z         |
|--------|-----------|-----------|-----------|
| H      | 31.334712 | 25.952683 | 23.968954 |
| H      | 24.077994 | 24.634683 | 24.687460 |
| C      | 25.040241 | 25.114321 | 24.781599 |
| C      | 25.162527 | 26.457126 | 24.863434 |
| H      | 24.314102 | 27.129052 | 24.840263 |
| C      | 26.225771 | 24.297831 | 24.816481 |
| O      | 26.260638 | 23.073807 | 24.738569 |
| N      | 27.416371 | 25.018988 | 24.960959 |
| H      | 28.266610 | 24.460188 | 25.058761 |
| C      | 27.545978 | 26.379028 | 25.031302 |
| O      | 28.637922 | 26.955166 | 25.138759 |
| N      | 26.380214 | 27.071303 | 24.977389 |
| H      | 26.423967 | 28.096478 | 25.031653 |
| O      | 27.729370 | 21.324127 | 23.206129 |
| H      | 27.168268 | 21.873561 | 23.789001 |
| H      | 27.189725 | 20.579329 | 22.922068 |
| O      | 30.290704 | 21.730176 | 23.492441 |
| H      | 30.088038 | 23.128010 | 26.336663 |
| H      | 30.810468 | 20.921953 | 23.585396 |
| O      | 30.026700 | 23.526241 | 25.458901 |
| H      | 30.841051 | 22.860584 | 22.141805 |
| H      | 30.190509 | 22.797308 | 24.805248 |
| O      | 31.803095 | 25.923204 | 22.626596 |
| H      | 31.601360 | 25.076529 | 22.150450 |
| H      | 30.791599 | 23.431358 | 20.691120 |
| O      | 25.925454 | 29.823564 | 25.111141 |
| H      | 26.039071 | 30.456803 | 24.392606 |
| H      | 25.959308 | 30.347032 | 25.920597 |
| O      | 31.135593 | 23.598479 | 21.574494 |
| H      | 32.712805 | 26.170516 | 22.426617 |
| H      | 29.344205 | 21.447262 | 23.349634 |
| O      | 30.933670 | 25.913178 | 24.940428 |
| H      | 30.757526 | 24.959779 | 25.185838 |
| H      | 30.022650 | 26.379753 | 24.997623 |



Table S26 Optimized Cartesian coordinates of 7c at MP2/Def2TZVP level. Electronic energy is equal to -948.7918098 Hartree.

| Symbol | x         | y         | z         |
|--------|-----------|-----------|-----------|
| H      | 31.037792 | 27.405512 | 27.045191 |
| H      | 24.111597 | 24.408355 | 24.849881 |
| C      | 25.027895 | 24.973141 | 24.928443 |
| C      | 25.022915 | 26.317250 | 25.051556 |
| H      | 24.111860 | 26.900913 | 25.078987 |
| C      | 26.288227 | 24.271857 | 24.898630 |
| O      | 26.432086 | 23.054719 | 24.808156 |
| N      | 27.411357 | 25.093918 | 24.976278 |
| H      | 28.319882 | 24.628069 | 24.876903 |
| C      | 27.428967 | 26.453516 | 25.136379 |
| O      | 28.459320 | 27.111967 | 25.249846 |
| N      | 26.186953 | 27.032046 | 25.157443 |
| H      | 26.173996 | 28.037446 | 25.265278 |
| O      | 26.632369 | 18.902955 | 27.282236 |
| H      | 28.513947 | 21.935191 | 26.913169 |
| H      | 26.062856 | 18.588206 | 27.992903 |
| O      | 29.830400 | 24.475970 | 28.255304 |
| H      | 27.023199 | 20.555935 | 27.019326 |
| H      | 30.206709 | 25.257371 | 27.798073 |
| O      | 27.231306 | 21.511961 | 26.922559 |
| H      | 29.777537 | 23.018507 | 23.711520 |
| H      | 26.924121 | 18.118203 | 26.805754 |
| O      | 29.523899 | 22.329358 | 26.863914 |
| H      | 29.653015 | 23.123680 | 27.474810 |
| H      | 30.728934 | 23.976303 | 24.533890 |
| O      | 32.048134 | 24.863785 | 24.939797 |
| H      | 32.787100 | 25.147265 | 24.391673 |
| H      | 31.794592 | 25.617738 | 25.504901 |
| O      | 29.853853 | 23.499224 | 24.545477 |
| H      | 29.703105 | 22.657613 | 25.935045 |
| H      | 30.176111 | 24.479924 | 29.154704 |
| O      | 30.707866 | 26.583621 | 26.660834 |
| H      | 26.751491 | 21.868736 | 26.150814 |
| H      | 29.913380 | 26.836467 | 26.134753 |

Table S27 Optimized Cartesian coordinates of 7d at MP2/Def2TZVP level. Electronic energy is equal to -948.7910496 Hartree.

| Symbol | x         | y         | z         |
|--------|-----------|-----------|-----------|
| H      | 29.828154 | 25.691022 | 26.850259 |
| H      | 23.880589 | 24.229406 | 25.631316 |
| C      | 24.756551 | 24.839212 | 25.470852 |
| C      | 24.687721 | 26.188748 | 25.425310 |
| H      | 23.757316 | 26.729229 | 25.543663 |
| C      | 26.034295 | 24.197450 | 25.315501 |
| O      | 26.240742 | 22.984883 | 25.384163 |
| N      | 27.090921 | 25.071703 | 25.062723 |
| H      | 27.990813 | 24.648261 | 24.815423 |
| C      | 27.035969 | 26.438688 | 25.073795 |
| O      | 28.044130 | 27.148191 | 24.941462 |
| N      | 25.796711 | 26.966457 | 25.242004 |
| H      | 25.745077 | 27.995247 | 25.250302 |
| O      | 31.698714 | 25.096333 | 24.770099 |
| H      | 31.139963 | 24.456836 | 24.292520 |
| H      | 32.402961 | 25.434229 | 24.174510 |
| O      | 33.698243 | 25.922597 | 23.145196 |
| H      | 28.684861 | 21.331745 | 26.704230 |
| H      | 33.769267 | 26.725758 | 22.617582 |
| O      | 28.614618 | 22.233270 | 26.366389 |
| H      | 29.379774 | 22.854761 | 24.825447 |
| H      | 27.681735 | 22.351593 | 26.057796 |
| O      | 29.143619 | 24.584491 | 27.738191 |
| H      | 29.010742 | 23.671732 | 27.406211 |
| H      | 29.273614 | 23.129529 | 23.302122 |
| O      | 26.048956 | 29.728811 | 25.271682 |
| H      | 26.967484 | 29.943087 | 25.069322 |
| H      | 25.547785 | 30.541654 | 25.142148 |
| O      | 29.494821 | 23.549556 | 24.143313 |
| H      | 29.292215 | 24.527184 | 28.688676 |
| H      | 34.603115 | 25.628965 | 23.300928 |
| O      | 30.169961 | 26.370090 | 26.186623 |
| H      | 30.875583 | 25.889292 | 25.543649 |
| H      | 29.377922 | 26.706281 | 25.657737 |

Table S28 Optimized Cartesian coordinates of 11a at MP2/Def2TZVP level. Electronic energy is equal to -1254.1378075 Hartree.

| Symbol | x         | y         | z         |
|--------|-----------|-----------|-----------|
| H      | -2.192111 | 1.574206  | 3.394751  |
| H      | -0.712661 | -1.607888 | -4.856904 |
| C      | -0.975155 | -0.828161 | -4.158729 |
| C      | -1.379040 | 0.390583  | -4.576034 |
| H      | -1.463613 | 0.654691  | -5.622255 |
| C      | -0.889457 | -1.096024 | -2.744139 |
| O      | -0.519654 | -2.164291 | -2.254641 |
| N      | -1.274590 | -0.045167 | -1.926936 |
| H      | -0.670778 | 1.223605  | 3.474920  |
| C      | -1.650182 | 1.211825  | -2.325004 |
| O      | -1.923061 | 2.117367  | -1.545431 |
| N      | -1.703468 | 1.378335  | -3.686867 |
| H      | -1.986738 | 2.295982  | -4.003409 |
| O      | -0.656437 | 3.090289  | 0.709114  |
| H      | -0.254750 | -3.486481 | 1.066632  |
| H      | 2.263245  | -2.813842 | 0.294755  |
| O      | 1.783235  | 2.574897  | 0.599335  |
| H      | 3.071792  | 3.098666  | 3.563461  |
| H      | 2.175373  | -0.555405 | 0.187875  |
| O      | -0.708817 | -3.081678 | 1.837347  |
| H      | -1.363345 | -3.721924 | 2.140237  |
| H      | 2.154963  | 2.625528  | 1.535421  |
| O      | -0.985669 | -0.496360 | 0.872856  |
| H      | 0.629883  | -2.237494 | 2.937559  |
| H      | 2.069499  | 1.885160  | 3.595620  |
| O      | -1.410052 | 1.413703  | 2.853160  |
| H      | -1.256090 | -0.208107 | -0.910581 |
| H      | 0.879301  | -4.485610 | -0.830641 |
| O      | 1.533179  | 0.150761  | -0.018099 |
| H      | 0.776739  | 2.853640  | 0.623831  |
| H      | 0.318918  | -3.062641 | -1.081405 |
| O      | 2.636188  | 2.436596  | 3.017036  |
| H      | -1.078060 | -1.400831 | 1.235018  |
| H      | -1.293932 | 0.112277  | 1.573992  |
| O      | 0.769782  | -3.625106 | -0.406440 |
| H      | -1.172573 | 2.807429  | -0.073608 |
| H      | 1.788122  | 1.581285  | 0.323859  |
| O      | 0.857838  | 0.701911  | 4.237683  |
| H      | 1.075610  | -0.198085 | 3.859694  |
| H      | 0.881479  | 0.587097  | 5.196102  |
| O      | 1.368147  | -1.664155 | 3.206699  |
| H      | 2.054163  | -1.825962 | 2.536739  |
| H      | -1.049875 | 2.641344  | 1.480348  |
| O      | 2.830476  | -2.178324 | 0.779355  |
| H      | 3.741661  | -2.466261 | 0.648798  |
| H      | 0.680866  | -0.145737 | 0.369727  |

Table S29 Optimized Cartesian coordinates of 11b at MP2/Def2TZVP level. Electronic energy is equal to -1254.135561 Hartree.

| Symbol | x         | y         | z         |
|--------|-----------|-----------|-----------|
| H      | -3.166836 | 2.630893  | -1.348966 |
| H      | -1.970295 | -4.083452 | 2.941055  |
| C      | -1.703753 | -3.038986 | 2.988485  |
| C      | -2.071997 | -2.257704 | 4.025697  |
| H      | -2.650122 | -2.627033 | 4.862910  |
| C      | -0.930346 | -2.465886 | 1.915319  |
| O      | -0.543582 | -3.093215 | 0.927489  |
| N      | -0.633709 | -1.118415 | 2.055896  |
| H      | 0.242356  | 2.084433  | 2.188189  |
| C      | -0.998233 | -0.302589 | 3.102009  |
| O      | -0.708456 | 0.883318  | 3.177949  |
| N      | -1.729520 | -0.935297 | 4.078527  |
| H      | -2.004297 | -0.353760 | 4.858887  |
| O      | 0.751584  | 2.462521  | 1.442851  |
| H      | 1.650833  | -0.858025 | -3.767801 |
| H      | 3.822805  | -1.562398 | -0.666085 |
| O      | 2.372698  | -0.219838 | -3.638920 |
| H      | 0.437914  | -3.146713 | -0.436243 |
| H      | 2.830575  | -0.537679 | -2.842566 |
| O      | 1.153760  | 4.291422  | -2.073100 |
| H      | 1.893753  | 4.905626  | -2.112287 |
| H      | 0.991199  | 1.668701  | 0.913850  |
| O      | 1.220608  | 2.147370  | -3.779928 |
| H      | 1.161822  | 2.406111  | -4.707916 |
| H      | 1.715410  | -0.268226 | -0.319953 |
| O      | -2.311160 | 2.389582  | -0.978945 |
| H      | -0.088686 | -0.678365 | 1.299306  |
| H      | 1.334434  | 3.555516  | -2.694809 |
| O      | -0.455397 | 3.943508  | -0.096051 |
| H      | 0.177871  | 4.139926  | -0.856091 |
| H      | 1.796271  | 1.334570  | -3.756628 |
| O      | 2.971481  | -1.359382 | -1.071568 |
| H      | 2.459297  | -2.195337 | -1.092743 |
| H      | 0.049448  | 3.325683  | 0.621294  |
| O      | -0.036075 | -1.809901 | -3.361454 |
| H      | -0.528738 | -2.327757 | -4.009164 |
| H      | 1.124241  | -4.217990 | -1.323671 |
| O      | 0.996145  | -3.264037 | -1.244792 |
| H      | -1.918706 | 1.696978  | -1.551199 |
| H      | -1.240874 | 3.425902  | -0.459271 |
| O      | 0.896221  | 0.181692  | -0.028106 |
| H      | 0.383452  | 0.364231  | -0.846660 |
| H      | 0.228281  | -2.436522 | -2.653058 |
| O      | -0.634018 | 0.703178  | -2.297098 |
| H      | -0.114473 | 1.256912  | -2.917937 |
| H      | -0.655985 | -0.183342 | -2.710828 |

Table S30 Optimized Cartesian coordinates of 11c at MP2/Def2TZVP level. Electronic energy is equal to -1254.135348 Hartree.

| Symbol | x         | y         | z         |
|--------|-----------|-----------|-----------|
| H      | 1.004311  | -0.239102 | 3.578099  |
| H      | 1.714074  | -1.187932 | -4.234983 |
| C      | 1.496665  | -0.265525 | -3.718981 |
| C      | 1.728993  | 0.937932  | -4.290291 |
| H      | 2.146674  | 1.045508  | -5.283162 |
| C      | 0.931377  | -0.311185 | -2.399304 |
| O      | 0.653911  | -1.357819 | -1.787333 |
| N      | 0.695111  | 0.908934  | -1.807135 |
| H      | -0.163393 | 1.997871  | 1.019266  |
| C      | 0.910273  | 2.145257  | -2.370009 |
| O      | 0.661292  | 3.202540  | -1.808014 |
| N      | 1.438496  | 2.100406  | -3.639119 |
| H      | 1.608912  | 2.999209  | -4.071743 |
| O      | -0.908135 | -3.195858 | 1.872837  |
| H      | 1.111130  | 0.260690  | 2.102624  |
| H      | -1.279294 | -2.950630 | 1.005763  |
| O      | -0.764230 | 3.678892  | 0.502609  |
| H      | -0.268513 | 3.686962  | -0.342526 |
| H      | -0.920562 | -1.825107 | -1.062847 |
| O      | 2.514088  | -2.874746 | -0.379044 |
| H      | -2.246386 | -2.607962 | -1.262520 |
| H      | -2.640578 | -0.858126 | 2.720166  |
| O      | -0.001262 | 1.039334  | 0.904673  |
| H      | -0.878071 | 0.621319  | 1.076835  |
| H      | 0.592514  | -2.930818 | 1.990744  |
| O      | 1.576122  | -2.661572 | 2.046565  |
| H      | -0.554443 | 4.507109  | 0.950442  |
| H      | 1.990569  | -2.785601 | 1.145065  |
| O      | -1.749482 | -2.095006 | -0.613506 |
| H      | -2.959271 | 0.755652  | 0.831347  |
| H      | 0.370146  | 0.908504  | -0.818477 |
| O      | -2.499156 | -0.056211 | 1.148268  |
| H      | 1.921759  | -2.496537 | -1.053389 |
| H      | -4.054530 | 2.869104  | 0.192042  |
| O      | 1.550826  | -0.319030 | 2.759827  |
| H      | 1.609205  | -1.626715 | 2.347814  |
| H      | -3.278124 | -1.676068 | 3.887003  |
| O      | -2.434084 | -1.451254 | 3.477710  |
| H      | -2.489353 | -0.694188 | 0.409980  |
| H      | -1.471355 | -2.751076 | 2.535449  |
| O      | -0.252084 | -0.180652 | 4.740092  |
| H      | -0.162587 | -0.242162 | 5.696436  |
| H      | -1.074550 | -0.644198 | 4.497543  |
| O      | -3.241223 | 2.355203  | 0.222829  |
| H      | 2.940559  | -3.647855 | -0.764051 |
| H      | -2.509074 | 2.991678  | 0.319683  |

Table S31 Optimized Cartesian coordinates of 11d at MP2/Def2TZVP level. Electronic energy is equal to -12547134774 Hartree.

| Symbol | x         | y         | z         |
|--------|-----------|-----------|-----------|
| H      | -0.674207 | 4.057961  | 1.655579  |
| H      | -0.430453 | -4.626479 | -0.470237 |
| C      | 0.016719  | -3.677890 | -0.725166 |
| C      | 0.754074  | -3.513538 | -1.848504 |
| H      | 0.939716  | -4.314796 | -2.552731 |
| C      | -0.171080 | -2.557083 | 0.150700  |
| O      | -0.834288 | -2.576764 | 1.199585  |
| N      | 0.443650  | -1.386024 | -0.255939 |
| H      | 0.690903  | 3.178946  | -1.144721 |
| C      | 1.180852  | -1.202896 | -1.399717 |
| O      | 1.672590  | -0.111525 | -1.699158 |
| N      | 1.317333  | -2.314793 | -2.175727 |
| H      | 1.864684  | -2.234946 | -3.042387 |
| O      | 2.694698  | -2.640126 | -4.583774 |
| H      | 3.651794  | -2.730701 | -4.662810 |
| H      | 2.000710  | 3.045961  | -0.200456 |
| O      | -2.534263 | 1.490769  | -0.700082 |
| H      | 2.394253  | -2.344358 | -5.451319 |
| H      | -0.968749 | 1.835910  | -1.536360 |
| O      | 2.724278  | 1.817187  | 0.283267  |
| H      | -0.255874 | 5.575140  | 1.560326  |
| H      | -2.050007 | 2.307284  | 0.855747  |
| O      | 0.565479  | 0.717599  | 1.631172  |
| H      | 2.758768  | 1.164444  | -0.435416 |
| H      | -3.311023 | 0.592820  | 4.121903  |
| O      | 0.038475  | 4.674532  | 1.389350  |
| H      | 0.849562  | 4.199994  | 0.162947  |
| H      | -1.961172 | -0.031539 | 3.655343  |
| O      | -2.983245 | -0.638268 | 0.803586  |
| H      | -2.068323 | 2.057059  | 2.391905  |
| H      | -0.113780 | -1.605269 | 4.239643  |
| O      | -0.470816 | -1.104151 | 3.496174  |
| H      | -0.588192 | -1.745227 | 2.760186  |
| H      | 0.449225  | 1.317409  | -1.969157 |
| O      | -0.095238 | 2.120304  | -1.876091 |
| H      | 0.375958  | -0.568020 | 0.374701  |
| H      | -2.442286 | -1.438788 | 0.892081  |
| O      | -2.695794 | 0.555133  | 3.379757  |
| H      | -3.108991 | -0.315845 | 1.713500  |
| H      | -3.321292 | 1.711529  | -1.213395 |
| O      | -1.559573 | 2.496540  | 1.683307  |
| H      | 0.449006  | 0.214452  | 2.458972  |
| H      | 2.132258  | 1.401721  | 0.943571  |
| O      | 1.350464  | 3.746300  | -0.593744 |
| H      | -2.721774 | 0.616261  | -0.266687 |
| H      | -0.147549 | 1.395555  | 1.648056  |

Table S32 Optimized Cartesian coordinates of 11e at MP2/Def2TZVP level. Electronic energy is equal to -1254.134745 Hartree.

| Symbol | x         | y         | z         |
|--------|-----------|-----------|-----------|
| H      | -2.140272 | -1.956669 | -2.109823 |
| H      | -2.888484 | 2.844708  | 2.455498  |
| C      | -1.916606 | 2.375122  | 2.448529  |
| C      | -0.985830 | 2.660409  | 3.383693  |
| H      | -1.154936 | 3.362998  | 4.189353  |
| C      | -1.600277 | 1.435714  | 1.403283  |
| O      | -2.355228 | 1.121885  | 0.480156  |
| N      | -0.332410 | 0.870848  | 1.481652  |
| H      | -0.497517 | 1.244464  | -2.202583 |
| C      | 0.622857  | 1.154531  | 2.415411  |
| O      | 1.747401  | 0.643701  | 2.414428  |
| N      | 0.249529  | 2.069085  | 3.360036  |
| H      | 0.948908  | 2.291582  | 4.056628  |
| O      | 1.292371  | 1.645952  | -2.272749 |
| H      | 1.854133  | 1.702492  | -1.458726 |
| H      | 1.539753  | 2.394914  | -2.828527 |
| O      | 2.920944  | 1.387547  | -0.179991 |
| H      | 3.491240  | 0.621972  | -0.371089 |
| H      | 2.677859  | 1.289198  | 0.752904  |
| O      | 0.289629  | -1.399862 | -0.067829 |
| H      | 4.879908  | -1.510954 | -0.842485 |
| H      | 0.958812  | -1.837469 | 0.491393  |
| O      | 1.727115  | -1.074866 | -2.429112 |
| H      | 2.617730  | -1.229279 | -2.060158 |
| H      | 1.675934  | -0.109447 | -2.589100 |
| O      | -2.025529 | -1.452466 | -3.041585 |
| H      | 0.860752  | -2.064568 | -3.677235 |
| H      | -1.261417 | -1.868880 | -3.551360 |
| O      | 2.533138  | -1.891571 | 1.572419  |
| H      | 0.734803  | -1.296503 | -0.939936 |
| H      | 2.723202  | -2.548182 | 2.253770  |
| O      | -1.404324 | 0.881742  | -2.197875 |
| H      | -1.767126 | 1.036576  | -1.307670 |
| H      | -1.771681 | -0.497857 | -2.800942 |
| O      | -2.183774 | -2.503586 | -0.818656 |
| H      | -1.344051 | -2.264323 | -0.380533 |
| H      | -2.904507 | -2.133199 | -0.259193 |
| O      | -3.989112 | -1.183756 | 0.709005  |
| H      | -4.949414 | -1.258901 | 0.730952  |
| H      | -3.782364 | -0.239887 | 0.630445  |
| O      | 0.080377  | -2.469145 | -4.105825 |
| H      | 0.301080  | -2.661328 | -5.022786 |
| H      | 2.340684  | -1.053318 | 2.039597  |
| O      | 3.972639  | -1.206519 | -0.720422 |
| H      | 3.650023  | -1.614451 | 0.108132  |
| H      | -0.096315 | 0.124444  | 0.798906  |

Table S33 Optimized Cartesian coordinates of 11f at MP2/Def2TZVP level. Electronic energy is equal to -1254.134109 Hartree.

| Symbol | x         | y         | z         |
|--------|-----------|-----------|-----------|
| H      | 0.940888  | 1.033999  | -2.324799 |
| H      | -1.793512 | -3.668006 | -0.912381 |
| C      | -0.818898 | -3.395724 | -0.537480 |
| C      | -0.026368 | -4.285415 | 0.100199  |
| H      | -0.316583 | -5.314089 | 0.271542  |
| C      | -0.346927 | -2.050523 | -0.722149 |
| O      | -1.003923 | -1.140891 | -1.252072 |
| N      | 0.926747  | -1.797356 | -0.255832 |
| H      | -0.550196 | -1.338601 | 3.485505  |
| C      | 1.729187  | -2.668091 | 0.434874  |
| O      | 2.827482  | -2.369566 | 0.890333  |
| N      | 1.204011  | -3.928969 | 0.574189  |
| H      | 1.790789  | -4.594667 | 1.059680  |
| O      | 0.072634  | 0.989951  | -2.765871 |
| H      | -0.353260 | 0.205286  | -2.369133 |
| H      | -1.219802 | 3.531239  | -1.805255 |
| O      | -3.530547 | 2.595193  | 0.401224  |
| H      | -3.058994 | 1.795805  | 0.721677  |
| H      | -4.222332 | 2.781348  | 1.047277  |
| O      | 0.375624  | 2.295679  | 0.966755  |
| H      | -0.400047 | 1.691296  | 0.977543  |
| H      | 0.838563  | 2.126548  | 1.808052  |
| O      | -1.761074 | 0.550809  | 0.878044  |
| H      | -1.672087 | -0.004951 | 0.079448  |
| H      | -1.443335 | -0.023780 | 1.610307  |
| O      | 3.833711  | 0.122752  | 1.314492  |
| H      | 4.786621  | 0.162428  | 1.460196  |
| H      | 3.615339  | -0.823477 | 1.160930  |
| O      | 1.832376  | 0.957996  | 2.997481  |
| H      | 1.296697  | -0.837001 | -0.388228 |
| H      | 2.642987  | 0.691850  | 2.504833  |
| O      | -1.350736 | 3.063893  | -2.717386 |
| H      | -2.316014 | 2.770590  | -2.724777 |
| H      | -0.749121 | 2.221886  | -2.761138 |
| O      | -0.289426 | -0.885016 | 2.675930  |
| H      | 0.480080  | -0.329958 | 2.914905  |
| H      | 2.136305  | 1.267714  | 3.859350  |
| O      | -3.762491 | 2.256692  | -2.349510 |
| H      | -3.946720 | 2.373519  | -1.396687 |
| H      | -4.570800 | 2.452716  | -2.835313 |
| O      | -1.217908 | 4.098603  | -0.415587 |
| H      | -0.513166 | 3.737496  | 0.156071  |
| H      | -2.049371 | 3.841168  | 0.022125  |
| O      | 1.931349  | 0.799524  | -0.703885 |
| H      | 1.446882  | 1.438425  | -0.130809 |
| H      | 2.836246  | 0.787974  | -0.349720 |



Table S34 Optimized Cartesian coordinates of 12a at MP2/Def2TZVP level. Electronic energy is equal to -1330.464509 Hartree.

| Symbol | x         | y         | z         |
|--------|-----------|-----------|-----------|
| H      | -2.392951 | 0.876830  | 2.079396  |
| H      | 3.148255  | -0.906869 | -0.330821 |
| C      | 2.241313  | -1.219200 | 0.164156  |
| C      | 1.785436  | -2.487821 | 0.065721  |
| H      | 2.298650  | -3.251057 | -0.504758 |
| C      | 1.479187  | -0.264080 | 0.920789  |
| O      | 1.791303  | 0.935733  | 1.049028  |
| N      | 0.342639  | -0.746574 | 1.520993  |
| H      | -0.299648 | -0.072103 | 1.995646  |
| C      | -0.136486 | -2.024567 | 1.426390  |
| O      | -1.172533 | -2.387950 | 1.974224  |
| N      | 0.639502  | -2.880029 | 0.690373  |
| H      | 0.253826  | -3.806432 | 0.557234  |
| O      | -2.756110 | 0.875330  | -1.358539 |
| H      | -1.247921 | 1.933523  | 2.187233  |
| H      | -4.792980 | 0.611606  | 1.338004  |
| O      | 0.098585  | 3.057099  | 1.324664  |
| H      | 0.294100  | -1.060682 | -2.577433 |
| H      | 6.249993  | 3.492130  | -0.559416 |
| O      | 1.531780  | 1.686979  | -2.579327 |
| H      | -4.297957 | -2.970427 | 1.857541  |
| H      | 0.941613  | -1.050875 | -4.016653 |
| O      | -3.717255 | -2.467782 | 1.272305  |
| H      | -2.833292 | -2.463134 | 1.707967  |
| H      | 2.357242  | 1.738412  | -1.952307 |
| O      | 1.079938  | -0.762357 | -3.107710 |
| H      | 3.052116  | 1.533910  | -0.097599 |
| H      | 4.116825  | 2.407328  | -0.898635 |
| O      | 3.448619  | 1.695394  | -0.978205 |
| H      | -2.546181 | -4.318695 | -1.406052 |
| H      | 5.315410  | 4.520170  | -1.211651 |
| O      | 5.320662  | 3.691098  | -0.720294 |
| H      | -1.395980 | -2.149453 | -1.367740 |
| H      | 1.369103  | 0.715078  | -2.841474 |
| O      | -1.512521 | 1.038507  | 2.455693  |
| H      | -1.649592 | -0.612496 | -1.537289 |
| H      | 0.796893  | 2.370994  | 1.404951  |
| O      | -0.490624 | 2.562906  | -1.338289 |
| H      | -3.270309 | 0.727731  | -0.532559 |
| H      | -3.998032 | -0.712497 | 1.129361  |
| O      | -0.948933 | -1.289924 | -1.507586 |
| H      | -1.309846 | 2.032896  | -1.312780 |
| H      | -0.329402 | 2.874474  | -0.424645 |
| O      | -3.946387 | 0.266017  | 1.029991  |
| H      | 0.443618  | 3.858798  | 1.734732  |
| H      | 0.702276  | 2.044534  | -2.084770 |
| O      | -2.144269 | -3.681475 | -0.804477 |
| H      | -2.842498 | -3.437789 | -0.169279 |
| H      | -3.403973 | 1.099169  | -2.037593 |

Table S35 Optimized Cartesian coordinates of 12b at MP2/Def2TZVP level. Electronic energy is equal to -1330.463542 Hartree.

| Symbol | x         | y         | z         |
|--------|-----------|-----------|-----------|
| H      | 0.979917  | 0.200594  | 3.725824  |
| H      | -0.037536 | 0.698922  | -5.144784 |
| C      | -0.668957 | 0.814189  | -4.277097 |
| C      | -1.989693 | 1.106319  | -4.374062 |
| H      | -2.508296 | 1.245197  | -5.313492 |
| C      | -0.147179 | 0.670988  | -2.961978 |
| O      | 1.128314  | 0.395532  | -2.851152 |
| N      | -0.882460 | 0.804201  | -1.866842 |
| H      | 1.379306  | 0.336516  | -1.878010 |
| C      | -2.195869 | 1.085799  | -1.983752 |
| O      | -2.957760 | 1.210199  | -0.994070 |
| N      | -2.730095 | 1.238897  | -3.242924 |
| H      | -3.718194 | 1.456968  | -3.287178 |
| O      | 2.051807  | 1.119638  | 3.134992  |
| H      | 1.691563  | 1.773069  | 2.507969  |
| H      | 2.758696  | 0.650705  | 2.653025  |
| O      | 3.338769  | -3.035905 | 1.688001  |
| H      | 3.974106  | -3.701706 | 1.976975  |
| H      | 2.974722  | -3.344309 | 0.820754  |
| O      | -1.892835 | 0.277473  | 2.857613  |
| H      | -2.262230 | -0.329410 | 2.188797  |
| H      | -1.918512 | 1.150105  | 2.423959  |
| O      | -0.051082 | -1.866377 | 0.203692  |
| H      | 0.394528  | -1.020276 | -0.009444 |
| H      | -1.010107 | -1.687197 | 0.158971  |
| O      | -1.872937 | 2.516979  | 1.116253  |
| H      | -2.270295 | 2.083036  | 0.319720  |
| H      | -2.434191 | 3.278582  | 1.309121  |
| O      | 0.751006  | -2.556403 | 2.739703  |
| H      | 0.420774  | -2.390473 | 1.828122  |
| H      | 1.672263  | -2.850903 | 2.622295  |
| O      | 0.255029  | -0.459562 | 4.016739  |
| H      | 0.487610  | -1.363455 | 3.562119  |
| H      | -0.627737 | -0.148437 | 3.607219  |
| O      | 1.654561  | 0.293356  | -0.284923 |
| H      | 2.502986  | 0.070281  | 0.152444  |
| H      | 1.363996  | 1.146125  | 0.103924  |
| O      | 3.767050  | -0.357263 | 1.402743  |
| H      | 4.695113  | -0.129810 | 1.268155  |
| H      | 3.744074  | -1.333645 | 1.538630  |
| O      | 0.860960  | 2.608113  | 1.025784  |
| H      | -0.122141 | 2.672354  | 1.033616  |
| H      | 1.182509  | 3.477337  | 0.757394  |
| O      | -2.743991 | -1.074252 | 0.519039  |
| H      | -3.528078 | -1.635599 | 0.479746  |
| H      | -2.939523 | -0.289349 | -0.040623 |
| O      | 2.038350  | -3.474402 | -0.595973 |
| H      | 1.965637  | -4.212080 | -1.210038 |
| H      | 1.146778  | -3.086744 | -0.505703 |

Table S36 Optimized Cartesian coordinates of 12c at MP2/Def2TZVP level. Electronic energy is equal to -1330.463377 Hartree.

| Symbol | x         | y         | z         |
|--------|-----------|-----------|-----------|
| H      | 3.129800  | -0.166963 | 1.008327  |
| H      | -1.715322 | -3.913701 | 2.620911  |
| C      | -1.472806 | -3.031456 | 2.048561  |
| C      | -2.421911 | -2.186713 | 1.572387  |
| H      | -3.482835 | -2.332282 | 1.729171  |
| C      | -0.125334 | -2.711160 | 1.734782  |
| O      | 0.800613  | -3.534120 | 2.140318  |
| N      | 0.211973  | -1.619470 | 1.055128  |
| H      | 1.702684  | -3.295000 | 1.752866  |
| C      | -0.754861 | -0.799265 | 0.586499  |
| O      | -0.471512 | 0.227369  | -0.081064 |
| N      | -2.065726 | -1.096595 | 0.847762  |
| H      | -2.784598 | -0.491135 | 0.431434  |
| O      | 1.843865  | 2.549524  | 1.381159  |
| H      | 0.921866  | 2.770698  | 1.722188  |
| H      | 1.878370  | 2.743342  | 0.367741  |
| O      | -0.526390 | 3.425405  | -2.394561 |
| H      | -0.810219 | 4.277150  | -2.748056 |
| H      | -1.129609 | 3.216001  | -1.639295 |
| O      | 3.692729  | -1.055166 | -0.632347 |
| H      | 3.004759  | -0.711793 | -1.243922 |
| H      | 4.540585  | -0.921554 | -1.071745 |
| O      | 1.948838  | 2.845975  | -1.121541 |
| H      | 1.956155  | 1.932059  | -1.480318 |
| H      | 1.199710  | 3.273972  | -1.574727 |
| O      | -0.573798 | 3.089705  | 2.110826  |
| H      | -0.819497 | 3.834673  | 2.669934  |
| H      | -1.206712 | 3.051246  | 1.364114  |
| O      | -3.866664 | 0.566379  | -0.628569 |
| H      | -3.557121 | 0.242816  | -1.510029 |
| H      | -4.830626 | 0.569855  | -0.656284 |
| O      | 2.417482  | 0.124530  | 1.605232  |
| H      | 2.057910  | 1.538983  | 1.513363  |
| H      | 1.695543  | -0.522794 | 1.446524  |
| O      | 3.151546  | -3.131921 | 1.125637  |
| H      | 3.372736  | -2.524345 | 0.392897  |
| H      | 3.744931  | -3.887793 | 1.062868  |
| O      | -0.393420 | 1.023289  | -3.776590 |
| H      | -0.279183 | 1.114981  | -4.730495 |
| H      | -0.451391 | 1.939554  | -3.426335 |
| O      | -2.640896 | -0.386117 | -2.804017 |
| H      | -2.979475 | -0.966714 | -3.493658 |
| H      | -1.873823 | 0.080166  | -3.191569 |
| O      | 1.578545  | 0.199703  | -1.837675 |
| H      | 0.859517  | 0.106821  | -1.166786 |
| H      | 1.099071  | 0.226398  | -2.684049 |
| O      | -1.855148 | 2.487120  | -0.241345 |
| H      | -2.777365 | 2.187574  | -0.338315 |
| H      | -1.367138 | 1.623525  | -0.191991 |

Table S37 Optimized Cartesian coordinates of 12d at MP2/Def2TZVP level. Electronic energy is equal to -1330.462419 Hartree.

| Symbol | x         | y         | z         |
|--------|-----------|-----------|-----------|
| H      | 2.584647  | -0.812765 | -3.918001 |
| H      | -0.897937 | 0.386081  | 4.156224  |
| C      | -1.045501 | -0.233913 | 3.285613  |
| C      | -2.076453 | -1.102690 | 3.194715  |
| H      | -2.810865 | -1.226226 | 3.980163  |
| C      | -0.102119 | -0.155832 | 2.203782  |
| O      | 0.909196  | 0.561074  | 2.203045  |
| N      | -0.376563 | -0.968783 | 1.121544  |
| H      | 0.301227  | -0.956483 | 0.340657  |
| C      | -1.423232 | -1.843714 | 1.001388  |
| O      | -1.613929 | -2.545952 | 0.012554  |
| N      | -2.245031 | -1.894408 | 2.096222  |
| H      | -3.031989 | -2.524293 | 2.021608  |
| O      | -2.068620 | 2.656745  | 1.438087  |
| H      | -1.357312 | -0.485643 | -2.244295 |
| H      | 0.615684  | 3.301003  | 0.300043  |
| O      | 2.912468  | 0.089520  | -4.075342 |
| H      | -1.131079 | -2.516332 | -1.656748 |
| H      | -2.648038 | 3.197133  | 1.986302  |
| O      | 1.826502  | 2.647774  | 0.632085  |
| H      | 2.100985  | -3.246132 | -3.246000 |
| H      | 4.097293  | -0.910129 | 1.956734  |
| O      | -1.530534 | 0.301810  | -1.700778 |
| H      | 1.624242  | 1.866276  | 1.186616  |
| H      | -2.608065 | 1.908761  | 1.070026  |
| O      | -3.242708 | 0.557715  | 0.316035  |
| H      | -1.065614 | 3.323881  | 0.533674  |
| H      | 1.875177  | 0.585994  | -1.455227 |
| O      | 1.763828  | -2.362791 | -3.055081 |
| H      | -0.399804 | 3.427165  | -0.987767 |
| H      | 2.479637  | -1.068146 | -0.003609 |
| O      | -0.945179 | -2.319972 | -2.604726 |
| H      | 0.784357  | -2.444823 | -3.036206 |
| H      | 3.651967  | 0.011309  | -4.686356 |
| O      | 1.780479  | -0.950342 | -0.685208 |
| H      | -1.218329 | 1.079945  | -2.191915 |
| H      | -1.594826 | -2.826563 | -3.107553 |
| O      | 2.033910  | 1.455807  | -1.897118 |
| H      | 1.933303  | -1.602136 | -1.398568 |
| H      | -4.160024 | 0.559639  | 0.019416  |
| O      | 3.212471  | -0.974337 | 1.582302  |
| H      | -2.696920 | 0.414411  | -0.497002 |
| H      | 2.553304  | 1.190827  | -2.686801 |
| O      | -0.305312 | 3.713078  | -0.031887 |
| H      | 2.233298  | 2.311430  | -0.189923 |
| H      | 0.667414  | 2.234338  | -2.360321 |
| O      | -0.223348 | 2.686394  | -2.438947 |
| H      | -0.208588 | 3.212875  | -3.247688 |
| H      | 2.641688  | -0.382733 | 2.098342  |

Table S38 Optimized Cartesian coordinates of 12e at MP2/Def2TZVP level. Electronic energy is equal to -1330.46171 Hartree.

| Symbol | x         | y         | z         |
|--------|-----------|-----------|-----------|
| H      | 2.155585  | -0.508733 | 0.288100  |
| H      | -2.702565 | -1.913433 | -2.811800 |
| C      | -1.834922 | -1.419893 | -2.401417 |
| C      | -1.410098 | -0.207735 | -2.838155 |
| H      | -1.904563 | 0.357485  | -3.617503 |
| C      | -1.068734 | -2.012474 | -1.365802 |
| O      | -1.478482 | -3.181290 | -0.921512 |
| N      | 0.013530  | -1.461432 | -0.847891 |
| H      | -0.892533 | -3.491901 | -0.181737 |
| C      | 0.419648  | -0.263291 | -1.312530 |
| O      | 1.455620  | 0.301569  | -0.866708 |
| N      | -0.304511 | 0.358536  | -2.295186 |
| H      | 0.008193  | 1.279019  | -2.624800 |
| O      | -2.417247 | 2.042467  | 1.125086  |
| H      | -2.018161 | 2.574938  | 0.388411  |
| H      | -3.145498 | 2.576376  | 1.465097  |
| O      | 0.412901  | 3.039478  | -2.978470 |
| H      | 1.295467  | 3.129204  | -2.560026 |
| H      | 0.459119  | 3.495532  | -3.827252 |
| O      | 2.512364  | -3.485367 | 0.801674  |
| H      | 1.615302  | -3.827870 | 0.979674  |
| H      | 3.139431  | -4.100551 | 1.196943  |
| O      | 1.298292  | 3.986353  | 0.852183  |
| H      | 1.925584  | 3.630575  | 0.190794  |
| H      | 1.694793  | 4.791756  | 1.204719  |
| O      | -1.100452 | 3.583438  | -0.571809 |
| H      | -0.323035 | 3.914972  | -0.085971 |
| H      | -0.811371 | 3.522387  | -1.495183 |
| O      | -1.219122 | -2.027720 | 2.744056  |
| H      | -1.817103 | -1.530670 | 2.123864  |
| H      | -1.709462 | -2.126716 | 3.569758  |
| O      | 2.573285  | -0.921343 | 1.111207  |
| H      | 2.610003  | -1.919326 | 0.982845  |
| H      | 1.909829  | -0.694505 | 1.944442  |
| O      | -0.187700 | -4.070852 | 1.290483  |
| H      | -0.508314 | -4.941020 | 1.560446  |
| H      | -0.564277 | -3.422565 | 1.933580  |
| O      | 0.076854  | 2.030985  | 2.566581  |
| H      | -0.820179 | 2.064269  | 2.191701  |
| H      | 0.583203  | 2.708379  | 2.086459  |
| O      | 1.061574  | -0.387523 | 2.950234  |
| H      | 0.718975  | 0.543950  | 2.861034  |
| H      | 0.273319  | -0.964737 | 2.960232  |
| O      | 2.540031  | 2.715926  | -1.291068 |
| H      | 2.234270  | 1.784683  | -1.154023 |
| H      | 3.484430  | 2.664984  | -1.483722 |
| O      | -2.655228 | -0.673705 | 0.961739  |
| H      | -3.548326 | -0.920739 | 0.697287  |
| H      | -2.636081 | 0.309948  | 0.986672  |

Table S39 Optimized Cartesian coordinates of 12f at MP2/Def2TZVP level. Electronic energy is equal to -1330.46062 Hartree.

| Symbol | x         | y         | z         |
|--------|-----------|-----------|-----------|
| H      | 1.153606  | -3.052276 | 1.279699  |
| H      | 0.311306  | 4.054870  | -3.190128 |
| C      | 0.713861  | 3.061461  | -3.064249 |
| C      | 1.611618  | 2.527808  | -3.928795 |
| H      | 1.989739  | 3.047345  | -4.799298 |
| C      | 0.316860  | 2.243072  | -1.971754 |
| O      | -0.551491 | 2.739458  | -1.135236 |
| N      | 0.794973  | 1.018218  | -1.776144 |
| H      | -0.833659 | 2.058379  | -0.440178 |
| C      | 1.679805  | 0.498834  | -2.656286 |
| O      | 2.146938  | -0.658834 | -2.538931 |
| N      | 2.077849  | 1.268274  | -3.721359 |
| H      | 2.730634  | 0.839575  | -4.366559 |
| O      | -3.400921 | 1.646549  | 2.481800  |
| H      | -4.036079 | 2.372243  | 2.490031  |
| H      | -2.746797 | 1.823903  | 3.204857  |
| O      | 3.726238  | -1.495053 | -0.339733 |
| H      | 4.668927  | -1.687087 | -0.412185 |
| H      | 3.422702  | -1.268398 | -1.238700 |
| O      | 0.391767  | -2.362263 | -1.587552 |
| H      | 1.015865  | -1.684951 | -1.985481 |
| H      | -0.496522 | -1.905588 | -1.261487 |
| O      | -1.405942 | 1.678948  | 4.226273  |
| H      | -0.674666 | 1.198972  | 3.788657  |
| H      | -1.007846 | 2.306214  | 4.837959  |
| O      | -0.079025 | -2.675731 | 2.607692  |
| H      | -0.996572 | -2.839705 | 2.286864  |
| H      | 0.012641  | -3.183230 | 3.423544  |
| O      | -2.586095 | -2.784322 | 1.527120  |
| H      | -3.181952 | -2.168131 | 2.031823  |
| H      | -3.101455 | -3.586200 | 1.374470  |
| O      | 1.614062  | -3.215866 | 0.433151  |
| H      | 2.461968  | -2.737078 | 0.440716  |
| H      | 0.871284  | -2.762308 | -0.760207 |
| O      | -1.473919 | 1.029872  | 0.597582  |
| H      | -2.263208 | 1.360928  | 1.078832  |
| H      | -0.876404 | 0.706166  | 1.321664  |
| O      | 0.146086  | 0.139928  | 2.555716  |
| H      | 0.999743  | 0.282654  | 2.077004  |
| H      | 0.088180  | -0.824248 | 2.703763  |
| O      | -1.723192 | -1.374016 | -0.741917 |
| H      | -2.129114 | -1.921220 | -0.039444 |
| H      | -1.684254 | -0.467429 | -0.368724 |
| O      | -4.081155 | -1.027187 | 2.825541  |
| H      | -4.478260 | -1.149864 | 3.693843  |
| H      | -3.942782 | -0.063951 | 2.720405  |
| O      | 2.123401  | 0.569122  | 0.826472  |
| H      | 2.861647  | -0.023390 | 0.607173  |
| H      | 1.625537  | 0.659667  | -0.005873 |
